21 JHR - 0000-0002-6844-1377

22

23 **Abstract**

24 The heteroplasmic state of eukaryotic cells allows for cryptic accumulation of defective  
25 mitochondrial genomes (mtDNA). “Purifying selection” mechanisms operate to remove such  
26 dysfunctional mtDNAs. We found that activators of programmed cell death (PCD), including the  
27 CED-3 and CSP-1 caspases, the BH3-only protein CED-13, and PCD corpse engulfment factors, are  
28 required in *C. elegans* to attenuate germline abundance of a 3.1 kb mtDNA deletion mutation,  
29 *uaDf5*, which is normally stably maintained in heteroplasmy with wildtype mtDNA. In contrast,  
30 removal of CED-4/Apaf1 or a mutation in the CED-4-interacting prodomain of CED-3, do not  
31 increase accumulation of the defective mtDNA, suggesting induction of a non-canonical germline  
32 PCD mechanism or non-apoptotic action of the CED-13/caspase axis. We also found that the  
33 abundance of germline mtDNA<sup>*uaDf5*</sup> reproducibly increases with age of the mothers. This effect is  
34 transmitted to the offspring of mothers, with only partial intergenerational removal of the  
35 defective mtDNA. In mutants with elevated mtDNA<sup>*uaDf5*</sup> levels, this removal is enhanced in older  
36 mothers, suggesting an age-dependent mechanism of mtDNA quality control. Indeed, we found  
37 that both steady-state and age-dependent accumulation rates of *uaDf5* are markedly decreased  
38 in long-lived, and increased in short-lived, mutants. These findings reveal that regulators of both  
39 PCD and the aging program are required for germline mtDNA quality control and its  
40 intergenerational transmission.

41

## 42 Introduction

43 Mitochondrial diseases are a group of conditions that affect mitochondrial functions in  
44 up to 1 in 4,300 people [1–3]. Generally, these diseases present as dysfunction in the tissues or  
45 organs with the most intensive energy demands, most commonly in muscle and the nervous  
46 system [4]. Many of these diseases are attributable to mutations in the mitochondrial DNA  
47 (mtDNA) or nuclear DNA (nDNA), and include those disorders with defects in mitochondrial  
48 function, dynamics, or quality control, or in which there is miscommunication between the  
49 mitochondria and the endoplasmic reticulum (ER) [3,5]. The progressive advancement of the  
50 diseased state resulting from age-dependent accumulation of mutant mtDNA is a common trait  
51 among mitochondrial diseases [6–8]. While the severity of the disease varies with the nature of  
52 the mutation, the most severe phenotypes result in childhood death, as in Leigh syndrome and  
53 MELAS [5,9]. As there are currently no pharmacological treatments for mitochondrial diseases, it  
54 is of great importance to uncover the cellular processes that underlie the regulation of mtDNA  
55 quality control.

56 mtDNAs show high mutation rates [10–12] and hence it is critical that cells possess  
57 mechanisms to remove detrimental mtDNA alleles, a process called purifying selection [13,14].  
58 Defects in this process can result in mitochondrial diseases, allowing harmful mtDNA mutations  
59 to persist through the maternal germline and subsequent generations. Processes that regulate  
60 mtDNA quality control include mitochondrial fission/fusion dynamics and mitophagy [8,15–20],  
61 and the mitochondrial unfolded protein response (UPR<sup>MT</sup>; [21–27]. Further, it has also been  
62 found that the insulin/IGF-1 signaling pathway (IIS; [28,29]) ameliorates the fitness defects of  
63 mutant mtDNA.

64           One potential cellular process that could be used to eliminate defective mtDNAs is the  
65   culling of cells bearing mtDNA mutations by programmed cell death (PCD). The mechanisms of  
66   both developmentally controlled and genotoxicity-induced PCD have been shown to be well-  
67   conserved across metazoans [30], and much of the machinery that choreographs this process is  
68   directed by mitochondria [31–33]. Mitochondrial-dependent processes participating in PCD  
69   include permeabilization of the inner mitochondrial membrane and release of mitochondrial  
70   factors that mediate transduction of intermediary events in the cell suicide program [31–33].  
71   Both mitochondrial function and PCD are linked to the process of organismal aging [34]. mtDNA  
72   mutations accumulate in tissues as organisms age, and it has been suggested that this  
73   accumulation is a major contributor to aging [35–37].

74           The nematode *C. elegans* provides an attractive model for exploring the potential role of  
75   PCD in mtDNA purifying selection. The well-described, conserved PCD regulatory pathway in *C.*  
76   *elegans* functions not only to eliminate 131 somatic cells during development through a rigidly  
77   stereotyped program [38], but is also activated apparently stochastically during germline  
78   development, resulting in the death of >95% of nuclei that would otherwise be destined to  
79   become oocytes in the mature hermaphrodite [30,39–41]. In addition to this “physiological” PCD,  
80   germline nuclei that have experienced genotoxic stress are eliminated through p53-dependent  
81   apoptosis, as is also the case in somatic mammalian cells [42,43]. Thus, germline PCD allows for  
82   selective removal of nuclei with damaged genomes, thereby preventing intergenerational  
83   transmission of defective nuclear DNA. Given the prominent role played by mitochondria in the  
84   PCD process, it is conceivable that mitochondrial dysfunction could trigger PCD in the germline

85 and, as such, might similarly provide a quality control mechanism for eliminating aberrant  
86 mtDNA, as seen for the nuclear genome.

87 We report here that germline mtDNA quality control in *C. elegans* is influenced by  
88 regulators of both PCD and the aging program. We find that pro-apoptotic regulators of germline  
89 PCD, notably the caspases CED-3 and CSP-1, the BH3-only domain protein CED-13, and regulators  
90 of cell corpse engulfment, reduce abundance of an mtDNA deletion and that abrogation of their  
91 functions results in elevated levels of the defective mtDNA. Notably, however, loss of the CED-3  
92 activator CED-4/Apaf1 [44,45] does not result in elevated levels of defective mtDNA. These  
93 findings raise the possibilities that either the caspases and the other pro-apoptotic factors  
94 function in mtDNA purifying selection by a non-canonical CED-4-independent cell death program,  
95 or that these pro-apoptotic regulators function in mtDNA purifying selection through a PCD-  
96 independent mechanism. We also report that defective mtDNA accumulates in the germline of  
97 animals with age and that although the abundance of the defective mtDNA is reduced in  
98 offspring, progeny of older mothers inherit higher levels of the mutant mtDNA than those from  
99 young mothers. Intergenerational removal of the defective mtDNA appears to be enhanced in  
100 older animals with defective mtDNA quality control. Further, we found that lifespan-extending  
101 mutations in both the IIS pathway and the non-IIS-dependent lifespan-regulator CLK-1/MCLK1  
102 decrease accumulation of defective mtDNA, and that short-lived mutants show elevated  
103 accumulation, implicating molecular regulators of the aging process in mtDNA purifying  
104 selection. Our findings reveal that the PCD machinery and the aging program contribute to the  
105 removal of mtDNA mutations during germline development and their intergenerational  
106 transmission.

107

## 108 Results

### 109 The stably maintained mtDNA deletion mutant *uaDf5* contains multiple linked mutations 110 resulting in aberrant proteins and shows deleterious effects on growth

111 To test the role of potential regulatory factors in mtDNA purifying selection, we took  
112 advantage of *uaDf5*, a 3.1 kb mtDNA deletion mutation that removes part or all of four protein-  
113 coding genes and seven tRNAs (Fig. 1A) [46]. Given the presumably deleterious nature of this  
114 defective mtDNA, it was of interest to understand how it is stably transmitted despite active  
115 purifying selection processes. While its maintenance at high levels is attributable in part to  
116 stabilization by the mitochondrial UPR [25], *uaDf5* persists, albeit at lower levels, in animals  
117 lacking this activity. One possible explanation for this phenomenon is that the mutant mtDNA  
118 might be maintained in heteroplasmy with an otherwise intact mtDNA carrying a complementing  
119 mutation. We sought to test this possibility through deep sequencing of mtDNA isolated from  
120 the *uaDf5*-bearing strain. Comprehensive sequence analysis revealed that, in addition to the  
121 large deletion, the strain indeed carries a second mtDNA mutation, *w47* (Fig. 1A, Fig. 1 – figure  
122 supplement 1A, B, C). *w47* is a single base pair insertion in the *nduo-4* gene that causes a  
123 frameshift, predicted to result in a truncated NADH dehydrogenase 4 (ND4) protein lacking 321  
124 residues (Fig. 1 – figure supplement 1D). ND4 is an essential transmembrane subunit within  
125 complex I of the mitochondrial respiratory chain (MRC), which drives NADH-oxidation-dependent  
126 transport of protons across the inner mitochondrial membrane [47–49]. While this raised the  
127 possibility of two complementing mtDNA genomes, we found that the *w47* mutation is present  
128 at the same abundance as the *uaDf5* deletion mutation (~75% of total mtDNA, Fig. 1 – figure  
129 supplement 1B) rather than that of the wild-type mtDNA, strongly suggesting that it resides on

130 the same mtDNA genome. As this second mutation cannot explain stabilization of the defective  
131 mtDNA by *trans*-complementation of two deleterious mutations, other mechanisms appear to  
132 promote the stable inheritance of *uaDf5*.

133 In addition to the aberrant protein encoded by the *w47* frameshift mutation in *nduo-4*, a  
134 second abnormal protein is encoded by the *uaDf5* genome: one end of the deletion results in a  
135 fusion protein comprised of the first 185 amino acids of NADH dehydrogenase 1 (ND1, a homolog  
136 of the core MT-ND1 transmembrane subunit of complex I of the MRC [47,49,50]), and the last 81  
137 amino acids of mitochondrial-encoded cytochrome b (CTB-1/CYTB, a transmembrane subunit of  
138 complex III of the MRC [47,49,51]) (Fig. 1 – figure supplement 1E). It is conceivable that  
139 accumulation of these two abnormal proteins -- the truncated ND4 and the ND1-CYTB fusion  
140 protein resulting from *w47* and *uaDf5*, respectively -- activate the UPR<sup>MT</sup>, which has been shown  
141 to result in clearance of mtDNA<sup>*uaDf5*</sup>, dependent on the ATFS-1 transcription factor [25,27].

142 Animals harboring mtDNA<sup>*uaDf5*</sup> are viable and fertile, presumably because they contain  
143 intact wildtype mtDNA [46]. However, we found that *uaDf5*-bearing animals displayed a  
144 significant reduction in brood size (WT 304 ± 4.8; *uaDf5* 201 ± 8.6 embryos laid,  $p < 0.001$ ) (Fig.  
145 1B) and a significant increase in embryonic lethality (WT 1.4 ± 0.2%; *uaDf5* 4.2 ± 0.7%,  $p < 0.001$ )  
146 (Fig. 1C). Additionally, *uaDf5* animals are slow-growing, evident in both the number of hours to  
147 reach gravidity (WT 63 ± 0.8; *uaDf5* 76 ± 1.4 hours at 20°C,  $p < 0.001$ ) (Fig. 1D) and the stage of  
148 development reached after 60 hours of feeding (WT: adult; *uaDf5*: mid-L4) (Fig. 1E). In contrast,  
149 however, we were surprised to find that lifespan was not substantially affected (WT 14 ± 0.4;  
150 *uaDf5* 15 ± 0.5 days) (Fig. 1F, Fig. 1 – figure supplement 2). Given the significant decline in the



151 majority of fitness parameters tested, we conclude that *uaDf5* is a useful tool for studying  
152 mitochondrial disease and mechanisms underlying mtDNA quality control.

### 153 **PCD regulators promote removal of mtDNA<sup>*uaDf5*</sup>**

154 During germline development in *C. elegans*, as many as 95% of nuclei destined to become  
155 potential oocytes are eliminated by PCD [39–41,52]. While this process has been proposed to be  
156 stochastically determined [39,52], it has also been suggested that it may function to selectively  
157 remove all but the most “fit” germline cells. As such, PCD could perform a role in purifying  
158 selection in the germline, wherein potential oocytes that undergo PCD are associated with higher  
159 levels of defective mtDNA. To test this hypothesis, we introduced *uaDf5* into various PCD mutants  
160 and quantified abundance of the defective mtDNA by digital-droplet PCR (ddPCR; see  
161 Supplementary Table 1 for list of mutants tested). In a wildtype genetic background, we found  
162 that the steady-state fractional abundance of *uaDf5* in populations of 200 day 1 adults (first day  
163 of adulthood) is highly reproducible across four separate trials, demonstrating the reliability and  
164 robustness of the assay. Our analyses confirmed that mtDNA<sup>*uaDf5*</sup> constitutes the major molar  
165 fraction of mtDNA in the *uaDf5*-bearing strain by a nearly 3:1 ratio (Fig. 2 – figure supplement 1).

166 CED-3 in *C. elegans* is the major executioner caspase in the canonical PCD pathway  
167 [38,52,53] and is required for virtually all PCD both in the germline and the soma (Fig. 2 – figure  
168 supplement 2). We found that two *ced-3* mutations that strongly block PCD [54] showed a  
169 significant increase in the ratio of defective to normal mtDNA from a molar ratio of 2.9:1 for *ced-*  
170 *3(+)* to 3.5:1 for *ced-3(n717)* and 4.6:1 for *ced-3(n1286)* (Fig. 2A). This effect appears to be  
171 exclusively attributable to an increase in mtDNA<sup>*uaDf5*</sup> in the PCD-deficient strains, as the  
172 abundance of mtDNA<sup>WT</sup> is not significantly different between the strains. These *ced-3(-)*

173 mutations both localize to the p15 domain of the protease portion of CED-3 (Fig. 2 – figure  
174 supplement 3), consistent with abolition of caspase activity. These findings implicate the CED-3  
175 caspase and its p15 domain in mtDNA quality control. We found that one other mutation located  
176 in the p15 domain showed only a very slight increase that was not statistically significant ( $n_{2454}$ :  
177 2.9:1, Fig. 2B). While it is unclear why this allele showed a weaker effect it is noteworthy that,  
178 unlike the other two mutations, which result in a dramatic alteration of the protein, this mutation  
179 is predicted to result in a relatively modest (ala → thr) single amino acid substitution.

180         A second caspase in *C. elegans*, CSP-1, also functions, albeit less prominently, in PCD.  
181 While loss of CSP-1 alone does not result in a strong reduction in PCD, it synergizes with loss of  
182 CED-3 both in PCD and in other caspase-dependent processes (Fig. 2 – figure supplement 2) [55–  
183 57]. We found that removing CSP-1 in the *msp-1(tm917)* knockout mutant results in a significant  
184 increase in mtDNA<sup>uaDf5</sup> abundance to a molar ratio of 3.9:1 (Fig. 2A). Further, we found that this  
185 mutation enhances the effect of the *ced-3(n717)* mutation, increasing the mtDNA<sup>uaDf5</sup>:mtDNA<sup>WT</sup>  
186 molar ratio from 3.5:1 to 4.7:1 (Fig. 2A). Together these findings demonstrate that caspase  
187 activity, and possible PCD-mediated clearance, are crucial for mtDNA quality control and function  
188 in purifying selection of defective mtDNA.

189         We sought to further investigate a potential role for PCD in mtDNA purifying selection by  
190 evaluating the requirement for the pro-apoptotic factor CED-13, a BH3-only domain protein that  
191 acts specifically in the germline to activate PCD [38,58,59]. Consistent with a requirement for PCD  
192 in purifying selection, we found that two *ced-13* alleles result in a very substantial increase in the  
193 mtDNA<sup>uaDf5</sup>:mtDNA<sup>WT</sup> molar ratio (*sv32*: 4.2:1 and *tm536*: 5.1:1) (Fig. 2A), supporting the notion  
194 that CED-13 promotes removal of defective mtDNA in the germline. CED-13 functions in PCD by

195 antagonizing the function of mitochondrially localized CED-9/Bcl-2 [58,59], which normally  
196 sequesters the apoptosome factor CED-4/APAF1 at mitochondria, thereby preventing it from  
197 triggering autocatalytic conversion of the executioner caspase zymogen proCED-3 to its pro-  
198 apoptotic protease structure (Fig. 2 – figure supplement 2) [60]. An equivalent action is carried  
199 out in the soma by the BH3-only protein EGL-1 [60]. *n1950*, a gain-of-function allele of *ced-9* that  
200 blocks the interaction of EGL-1 with CED-9 at the mitochondria, results in elimination of PCD in  
201 the soma but not the germline [39,52,60,61]. Consistent with the lack of effect of *ced-9(n1950gf)*  
202 on germline PCD, we found that the mtDNA<sup>*uaDf5*</sup>:mtDNA<sup>WT</sup> molar ratio was not increased in *ced-*  
203 *9(n1950gf)* mutants (2.2:1) (Fig. 2B). Thus, CED-3, CSP-1, and CED-13 are required both for  
204 germline PCD and for removal of mtDNA<sup>*uaDf5*</sup>.

205         Cells that undergo PCD are cleared by the surrounding cells in the process of engulfment  
206 and degradation, which is implemented through a set of redundant pathways that converge on  
207 the CED-10 GTPase [62–65] (Fig. 2 – figure supplement 2). Although this engulfment process is  
208 necessary primarily for removal of the resultant corpses, it also appears to play an active role in  
209 cell killing: inhibition of the engulfment pathway diminishes occurrence of PCD, likely through a  
210 complex feedback mechanism [66,67]. Further supporting a role for PCD in purifying selection,  
211 we found that single or double mutations of several genes that promote engulfment of cell  
212 corpses result in elevated mtDNA<sup>*uaDf5*</sup>:mtDNA<sup>WT</sup> molar ratios, ranging from 3.5:1 to 5.2:1 (4.1:1  
213 for *ced-1(e1735)*, 4.5:1 for *ced-2(e1752)*, 5.2:1 for the *ced-1(e1735); ced-2(e1752)* double  
214 mutant, 3.6:1 for *ced-10(n1993)*, and 4.8:1 for *ced-10(n3246)*; Fig. 2A).

215         We tested whether *generally* increased germline PCD alters mtDNA<sup>*uaDf5*</sup> abundance by  
216 examining the effect of removing the caspase-related factor, CSP-2, which has been shown to

217 play an anti-apoptotic role through inhibition of CED-3 autoactivation in the germline (Fig. 2 –  
218 figure supplement 2) [68]. We found that a loss-of-function mutation in *csp-2*, which elevates  
219 germline PCD, did not alter the mtDNA<sup>uaDf5</sup>:mtDNA<sup>WT</sup> molar ratio (2.9:1 for the *csp-2(tm3077)*  
220 knockout mutation) (Fig. 2B). This observation does not conflict with a requirement for PCD in  
221 purifying selection: a general increase in PCD in the germline of *csp-2(-)* animals would not be  
222 expected *per se* to alter the mechanism that *discriminates* defective from normal mtDNAs and  
223 therefore the relative abundance of the two forms. Rather, our findings suggest that the  
224 mechanisms that recognizes and disposes of the defective mtDNA specifically requires PCD  
225 components acting in a selective, rather than general process (i.e., in those cells with the highest  
226 burden of the defective mtDNA).

227

## 228 Evidence for non-canonical action of PCD regulators in mtDNA purifying selection

229 The foregoing results implicate a role for the pro-apoptotic CED-3 and CSP-1 caspases,  
230 CED-13, and the CED-1, 2, and -10 cell corpse engulfment factors in mtDNA purifying selection.  
231 However, several observations suggest that elimination of normal, physiological germline PCD  
232 *per se* is insufficient to increase accumulation of defective mtDNA, or that these factors promote  
233 purifying selection through a PCD-independent pathway. Specifically, we observed that the  
234 occurrence of PCD does not perfectly correlate with their effects on accumulation of mtDNA<sup>uaDf5</sup>  
235 in particular mutants.

236 First, we found that the *ced-3(n718)* allele lowers, rather than elevates, the abundance of  
237 mtDNA<sup>uaDf5</sup> (mtDNA<sup>uaDf5</sup>:mtDNA<sup>WT</sup> molar ratio of 1.8:1, Fig. 2C). This effect is likely to be  
238 attributable to the nature of the *n718* mutation. Those *ced-3* mutations that result in increased

239 mtDNA<sup>uaDf5</sup> levels (Fig. 2A) both alter the p15 domain, which is essential to the active caspase  
240 function. In contrast, the *n718* mutation changes a residue in the caspase activation and  
241 recruitment domain (CARD), located within the prodomain of the CED-3 zymogen, which is  
242 removed upon caspase activation and affects its activation by CED-4 (Fig. 2 – figure supplement  
243 3) [44,54]. While *ced-3(n718)* strongly compromises PCD, this mutation might not alter CED-3  
244 caspase function in a way that interferes with its role in mtDNA purifying selection.

245 Our surprising finding that while CED-3 activity is required for mtDNA purifying selection,  
246 a CED-3 mutation that compromises its activation by CED-4 did not elevate mtDNA<sup>uaDf5</sup> levels  
247 prompted us to investigate the requirement of CED-4 in mitochondrial purifying selection.  
248 Consistent with the effect of the *ced-3(n718)* mutation, we found that eliminating the function  
249 of the pro-apoptotic regulator CED-4, the *C. elegans* orthologue of mammalian Apaf1 and the  
250 upstream activator of CED-3 in the canonical PCD pathway [60,69], did not result in a marked  
251 increase in the relative abundance of mtDNA<sup>uaDf5</sup>. That is, while the mtDNA<sup>uaDf5</sup>:mtDNA<sup>WT</sup> molar  
252 ratio increased to 3.1:1 in the *ced-4(n1894)* mutant, the effect was not statistically significant.  
253 Moreover, the canonical allele *ced-4(n1162)* allele similarly showed no elevation in mtDNA<sup>uaDf5</sup>  
254 (molar ratio = 2.6:1; Fig. 2B). These results suggest that CED-3 caspase functions in mitochondrial  
255 purifying selection independently of the caspase-activating factor CED-4.

256

### 257 **Evidence that decreased fitness, but not lifespan, is attributable to mtDNA<sup>uaDf5</sup>-induced PCD**

258 Taken together, our results implicate many PCD regulatory factors, and potentially PCD, in  
259 the selective clearance of defective germline mtDNAs. Our additional observations suggest that  
260 defective mtDNAs may, in fact, *trigger* elevated germline PCD, resulting in the production of

261 fewer mature gametes and progeny. Specifically, we found that the significant decrease in brood  
262 size that we observed in *uaDf5*-bearing animals with a wildtype nuclear background is partially  
263 suppressed by both *ced-3(-)* and *ced-13(-)* mutations, which prevent PCD (Fig. 2D, Fig. 2 – figure  
264 supplement 4A), suggesting that elimination of PCD might rescue cells that would otherwise be  
265 provoked to die as a result of accumulation of defective mtDNA. Our findings further underscore  
266 the observation that accumulation of defective mtDNA in those animals that do survive does not  
267 affect longevity, as we found that lifespan is unaltered in these PCD mutants even when the levels  
268 of mtDNA<sup>*uaDf5*</sup> are nearly doubled (Fig. 2 – figure supplement 4B, C).

269

#### 270 **Age-dependent accumulation of mtDNA<sup>*uaDf5*</sup> in the germline**

271 Our findings that PCD regulators are required to reduce mtDNA<sup>*uaDf5*</sup> abundance, the  
272 central role that mitochondria play in PCD [31–33,70], the observed decline of mitochondrial  
273 health during the aging process [7,35–37,71–75], and the relationship between excessive PCD  
274 and the aging phenotype [34] led us to examine the dynamics of mtDNA<sup>*uaDf5*</sup> accumulation as  
275 worms age. We measured the fractional abundance of *uaDf5* in adults at progressively increased  
276 ages spanning day 1, defined as the first day of egg-laying, through day 10. Day 1 through day 4  
277 of adulthood encompasses the time during which nearly all self-progeny are produced. After day  
278 4, hermaphrodite sperm become depleted and the animals transition into a post-gravid,  
279 progressively aging state [76–78]. By day 10, animals exhibit indications of advanced age. Analysis  
280 of the abundance of mtDNA<sup>*uaDf5*</sup> revealed a progressive increase throughout gravidity and post-  
281 reproductive aging, with the mtDNA<sup>*uaDf5*</sup>:mtDNA<sup>WT</sup> molar ratio increasing from 2.9:1 to 5.5:1 (Fig.  
282 3A, Fig. 3 – figure supplement 1A). This age-related accumulation of *uaDf5* in adult worms is

283 reminiscent of the accumulation of mtDNA mutations seen in aging mammals [35,73,79] and  
284 suggests that *uaDf5* in *C. elegans* may be a useful tool for studying the role that mtDNA mutations  
285 play in aging.

286         Given that gametes are depleted with age, it is conceivable that the age-dependent  
287 increase in mtDNA<sup>*uaDf5*</sup> is attributable to accumulation in somatic mitochondria. To assess  
288 whether the observed age-related accumulation of mtDNA<sup>*uaDf5*</sup> occurs predominantly in the  
289 maternal germline or in somatic cells, we analyzed animals defective in germline development  
290 by taking advantage of the *glp-4(bn2)* mutant, which produces only a small number (~12) of  
291 germline cells compared to that in wildtype animals (~1,500), with no known effect on somatic  
292 gonad development [80]. In contrast to the increased mtDNA<sup>*uaDf5*</sup> abundance with age seen at  
293 permissive temperature (mtDNA<sup>*uaDf5*</sup>:mtDNA<sup>WT</sup> of 1.8:1 at day 1, rising to 2.6:1 at day 4, for an  
294 overall increase by 48%), we found that *glp-4(bn2)* animals at the non-permissive temperature  
295 showed a slight decrease in the defective mtDNA from day 1 to day 4 of adulthood (2.2:1 at day  
296 1, dropping to 2:1 at day 4, for an overall decrease of 6.3%) (Fig. 3B). These results strongly  
297 suggest that the observed age-dependent increase in mtDNA<sup>*uaDf5*</sup> abundance occurs exclusively  
298 in the germline. We found that mtDNA<sup>*uaDf5*</sup> does eventually appear to accumulate in somatic cells  
299 with age, as day 10 adults grown at the restrictive temperature showed a marked increase in the  
300 mtDNA<sup>*uaDf5*</sup>:mtDNA<sup>WT</sup> molar ratio compared to day 1 adults even in the absence of a germline  
301 (day 10 *glp-4(bn2)* molar ratio of 3.4:1, a 57% increase from day 1 levels) (Fig. 3B). We conclude  
302 that the marked increase in mtDNA<sup>*uaDf5*</sup> with age during the period of fecundity occurs primarily  
303 in the germline and that the defective mtDNA accumulates in both germline and somatic tissue  
304 during post-reproductive life.

305

### 306 **Age-dependent increase in mtDNA<sup>uaDf5</sup> burden is transmitted to progeny**

307 As the mtDNA is inherited strictly through the maternal germline, we posited that the  
308 age-dependent increase in the fractional abundance of germline mtDNA<sup>uaDf5</sup> might be  
309 transmitted to progeny animals. To test this hypothesis, we measured the molar ratio of  
310 mtDNA<sup>uaDf5</sup> in 200-worm populations of L1 larvae derived from day 1 – day 4 adults (Fig. 3C, Fig.  
311 3 – figure supplement 1B). This analysis led to two key observations: 1) the abundance of  
312 mtDNA<sup>uaDf5</sup> is reduced during transmission between mother and offspring (average decrease  
313 ranging from 6% to 13%), presumably as a result of purifying selection, and 2) the abundance of  
314 the defective mtDNA in the offspring correlates with the age of the mothers: the progeny of older  
315 mothers contain a markedly higher mtDNA<sup>uaDf5</sup>:mtDNA<sup>WT</sup> molar ratio (4.2:1) than that of younger  
316 mothers (2.6:1) (Fig. 3C, D). A similar trend was observed for mother-to-offspring transmission in  
317 five mutant strains with altered levels of mtDNA<sup>uaDf5</sup> (see below): in all cases, progeny contain  
318 lower abundance of mtDNA<sup>uaDf5</sup> than their mothers, and progeny of younger adults inherit a  
319 lower load of mtDNA<sup>uaDf5</sup> than progeny of older adults (Fig. 3C). These results reveal that mtDNA  
320 quality control occurs between primordial germ cell proliferation in the female germline and L1  
321 hatching, i.e., during oocyte maturation, embryogenesis, or both.

322

### 323 **The lifespan-determining IIS pathway regulates accumulation of mtDNA<sup>uaDf5</sup>**

324 We sought to determine whether the age-dependent accumulation of defective mtDNA  
325 is controlled by known molecular mechanisms that drive the aging program in *C. elegans*. The  
326 most prominent of these regulatory systems is the highly conserved insulin/IGF-1 (insulin-like



327 growth factor-1) pathway (IIS), which performs a pivotal regulatory function in aging and  
328 longevity [28,82,83] (Fig. 4 – figure supplement 1). Abrogation of the IIS signaling pathways, for  
329 example, as a result of mutations in the gene encoding the IIS receptor (DAF-2, in *C. elegans*),  
330 results in marked slowing of the aging program and extension of lifespan in worms, flies, and  
331 mice [84–87]. The IIS pathway also functions in a broad set of other processes including, in *C.*  
332 *elegans*, activation of two stages of developmental arrest, or diapause, at the L1 larval stage and  
333 in formation of the dispersal form, the dauer larva, as well as in the control of germline  
334 proliferation, stress resistance, fat metabolism, and neuronal/behavioral programs [28]. It was  
335 also reported that inhibition of the IIS pathway rescues various fitness parameters in a mtDNA  
336 mutator strain which contains a faulty mtDNA polymerase [29], consistent with a possible role in  
337 mtDNA quality control.

338 We found that two mutant alleles of *daf-2*, which reduce rates of aging and increase  
339 lifespan, result in dramatically decreased mtDNA<sup>uaDf5</sup>:mtDNA<sup>WT</sup> molar ratios from 2.8:1 to as low  
340 as 0.3:1 (0.3:1 for *daf-2(e1391)*; 0.8:1 for *daf-2(e1370)*; Fig. 4A; see Suppl. Table 2 for a list of  
341 lifespan mutants used in the analyses). Thus, the lifespan-extending effects of *daf-2* mutations  
342 are strongly correlated with diminished abundance of defective mtDNA, to the extent that it  
343 becomes the minor species of mtDNA.

344 The DAF-2 receptor acts by antagonizing the DAF-16/FoxO transcription factor, the major  
345 effector of IIS downstream, in response to insulin-like ligands. Thus, removal of *daf-16* function  
346 reverses the lifespan-extending effects of *daf-2(-)* mutants. We tested whether the DAF-2 → DAF-  
347 16 pathway similarly functions in mtDNA purifying selection. We found that eliminating DAF-16  
348 in two *daf-16* mutants results in slightly increased, albeit not statistically significant,

349 mtDNA<sup>uaDf5</sup>:mtDNA<sup>WT</sup> molar ratios (3.3:1 for *daf-16(mu86)*; 3.5:1 for *daf-16(mgDf50)*) (Fig. 4B).  
350 Further, we found that removal of DAF-16 in the *daf-16(mu86)* mutant suppressed the decreased  
351 mtDNA<sup>uaDf5</sup>:mtDNA<sup>WT</sup> molar ratios observed in two *daf-2* mutants, from 0.3:1 for *daf-2(e1391)* to  
352 1:1 for *daf-16(mu86)*; *daf-2(e1391)* and from 0.6:1 for *daf-2(e1370)* to 1.8:1 for *daf-16(mu86)*;  
353 *daf-2(e1370)*, consistent with observations reported in a recent study [88]. While the *daf-2(-)*  
354 effect on mtDNA<sup>uaDf5</sup> levels is largely dependent on DAF-16, neither double mutant restored  
355 mtDNA<sup>uaDf5</sup> levels to those seen in animals with a fully intact IIS pathway, suggesting that other  
356 DAF-2 targets might participate in removal of defective mtDNA (Fig. 4C). We found, conversely,  
357 that two mutations that reduce lifespan by eliminating the function of AAK-2 (AMP activated  
358 kinase-2), a conserved factor acting in the IIS pathway [28,89], result in elevated  
359 mtDNA<sup>uaDf5</sup>:mtDNA<sup>WT</sup> molar ratios as high as 4.4:1 compared to 2.8:1 in wildtype animals (3.8:1  
360 for *aak-2(ok524)* and 4.4:1 for *aak-2(gt33)*) (Fig. 4B). These findings demonstrate that alterations  
361 in the IIS pathway coordinately affect both lifespan and accumulation of defective mtDNA and  
362 that the DAF-2/DAF-16/AAK-2 axis acts similarly in both processes.

363

#### 364 **Synergistic effect of multiple aging pathways on mtDNA<sup>uaDf5</sup> accumulation**

365 In addition to IIS, other molecular regulatory pathways independently contribute to the  
366 rate of aging. These include CLK-1, a mitochondrial hydroxylase that functions in the pathway for  
367 ubiquinone synthesis [90,91]. *clk-1* mutants with a wildtype mitochondrial genome have been  
368 shown to contain levels of mtDNA that are elevated by 30%, perhaps as the result of a  
369 compensatory process that increases demand on mitochondrial abundance, or the action of CLK-  
370 1 as a regulator of mtDNA abundance in response to energy availability within the cell [92]. As

371 with long-lived *daf-2* mutants, we found that long-lived *clk-1(qm30)* mutants showed a greatly  
372 diminished mtDNA<sup>uaDf5</sup>:mtDNA<sup>WT</sup> molar ratio of 0.3:1 (Fig. 4A), comparable to that in *daf-2*  
373 mutants; again, mtDNA<sup>uaDf5</sup> is the minor species in these animals. As the IIS pathway and CLK-1  
374 appear to act separately in controlling lifespan, we postulated that elimination of both  
375 mechanisms might further reduce levels of the defective mtDNA. Indeed, we found that  
376 mtDNA<sup>uaDf5</sup> was completely eliminated in *daf-2(e1391) clk-1(qm30)* double mutants, revealing a  
377 strongly synergistic effect between the two age-determining systems (Fig. 4A). Thus, distinct  
378 regulatory pathways for longevity modulate the abundance of mtDNA<sup>uaDf5</sup> by apparently different  
379 mechanisms and elimination of the two pathways abrogates its maintenance.

380

381 **Age-dependent accumulation rate of mtDNA<sup>uaDf5</sup> strongly correlates with genetically altered**  
382 **rates of aging**

383 Our findings that the steady-state abundance of mtDNA<sup>uaDf5</sup> increases with maternal age  
384 and that mutants with increased lifespan show lower levels of the defective mtDNA raised the  
385 possibility that purifying selection is subject to the same control as aging clocks. To assess this  
386 potential connection, we analyzed the time-dependent rates of mtDNA<sup>uaDf5</sup> accumulation in  
387 animals with genetic backgrounds that alter the aging clock. Analysis of 21 different genetic  
388 backgrounds over the first ten days of adulthood revealed that the age-dependent progressive  
389 accumulation of mtDNA<sup>uaDf5</sup> is a consistent phenomenon (Fig. 4D). Comparison of long-lived  
390 mutants and wildtype using a linear regression model revealed a striking positive correlation  
391 between aging rate and age-dependent rate of accumulation of mtDNA<sup>uaDf5</sup>: all long-lived  
392 mutants in either the IIS pathway or *clk-1* accumulate mtDNA<sup>uaDf5</sup> at a substantially slower rate

393 as they age than do wildtype animals (Fig. 4E, Fig. 4 – figure supplement 2A, B). Conversely, we  
394 analyzed six short-lived IIS pathway mutant combinations and found that the *aak-2(ok524)* and  
395 *daf-16(mu86)* single mutants and *daf-16(-);daf-2(-)* double mutants all showed increased rates of  
396 mtDNA<sup>uaDf5</sup> accumulation (Fig. 4E, Fig. 4 – figure supplement 2C, D). These observations suggest  
397 that in both slower-aging and faster-aging strains, the rate of accumulation of deleterious mtDNA  
398 is a predictor of aging rate. In the two exceptional cases, the *aak-2(gt33)* and *daf-16(mgDf50)*  
399 single mutants, we did not observe an increased accumulation rate compared to wildtype;  
400 however, the mtDNA<sup>uaDf5</sup> levels are consistently higher than in these two mutants than in  
401 wildtype at all stages (Fig. 4E, Fig. 4 – figure supplement 2D) and thus diminished removal of  
402 mtDNA<sup>uaDf5</sup> overall correlates with decreased lifespan in these mutants as well. The greater  
403 mtDNA<sup>uaDf5</sup> accumulation rates seen in the short-lived animals is not attributable to the higher  
404 steady-state levels *per se*, as the rates of accumulation of defective mtDNA observed in the PCD  
405 mutants with higher mtDNA<sup>uaDf5</sup> levels show no correlation with the steady-state levels (Fig. 4 –  
406 figure supplement 2 E-H); rather these increased rates appear specifically to be a property of the  
407 shortened lifespan mutants.

408 Consistent with a relationship between aging rates and accumulation of defective mtDNA,  
409 we found that brood size is decreased and embryonic lethality is increased in short-lived *daf-16(-*  
410 *)* mutants compared to those in a wildtype nuclear background, while *uaDf5* does not impact  
411 either fitness parameter in the long-lived *clk-1* mutant (Fig. 4 – figure supplement 3). These  
412 results are consistent with the possibility that longevity pathways modulate fitness in part by  
413 regulating mitochondrial homeostasis.

414

415 **Evidence for late adulthood-specific mechanisms for removal of mtDNA<sup>uaDf5</sup>**

416 We obtained evidence that defective mtDNA is more effectively removed in offspring of  
417 aging adults that carry an unusually high burden of mtDNA<sup>uaDf5</sup>. The offspring of day 4 adults in  
418 those strains (“high” strains) with significantly higher steady-state fractional abundance of  
419 mtDNA<sup>uaDf5</sup> showed significantly greater rates of reduction of the defective mtDNA (reduction  
420 from 5.4:1 to 3.3:1 in *atfs-1(et15)*, from an extraordinarily high 6.5:1 to 2.8:1 in *ced-10(n1993)*,  
421 and from 6.4:1 to 3.3:1 in *ced-13(sv32)*) compared to offspring of (“low” strain) mothers with  
422 lower steady-state fractional abundance of the mutant mtDNA (reduction from 4.7:1 to 4.2:1 in  
423 WT, from 3.9:1 to 2.8:1 in *ced-3(n2454)*, and from 3.2:1 to 2.5:1 in *ced-4(n1162)*). Remarkably,  
424 therefore, day 4 progeny from “high” strains actually inherit a *lower* mtDNA<sup>uaDf5</sup> load than their  
425 siblings born from day 1-3 mothers (Fig. 3C, 5A). Indeed, we found a strong correlation ( $r^2=0.61$ ,  
426  $p < 0.001$ ) between the steady-state level of mtDNA<sup>uaDf5</sup> in mothers and the capacity for its  
427 removal between mother and progeny during day 4 of adulthood (Fig. 5B). These results raise  
428 the possibility that very high levels of mtDNA<sup>uaDf5</sup> in older mothers activate additional mtDNA  
429 purifying selection independent of the UPR<sup>MT</sup> and PCD machinery, thereby ensuring that progeny  
430 are not overloaded with defective mitochondria.

431

## 432 Discussion

433 We have obtained several lines of evidence indicating that regulators of PCD and the aging  
434 program function in mtDNA quality control and accumulation of defective mtDNA in *C. elegans*.  
435 We report eight major findings: 1) regulators of germline PCD are required for effective removal  
436 of deleterious mtDNA from the germline; 2) the cell death machinery functions in either a non-  
437 canonical cell death pathway or in a non-apoptotic role to mediate mitochondrial purifying  
438 selection; 3) the CSP-1 caspase has as strong of an effect on mitochondrial purifying selection as  
439 the major PCD regulator CED-3; 4) mtDNA<sup>uaDf5</sup> progressively accumulates in the germline as  
440 adults age; 5) this age-dependent accumulation of mtDNA<sup>uaDf5</sup> is transmitted to progeny;  
441 however, the burden of the defective mtDNA is lower in offspring than mothers suggesting  
442 intergenerational purifying selection; 6) two separate aging pathways, the IIS and CLK-1  
443 pathways, act synergistically to regulate mtDNA<sup>uaDf5</sup> levels; longer-lived mutants show reduced  
444 levels of the defective mtDNA while shorter-lived mutants show increased levels compared to  
445 otherwise wildtype animals; 7) the rate of mtDNA<sup>uaDf5</sup> accumulation is inversely correlated with  
446 lifespan in aging mutants; 8) intergenerational removal of mtDNA<sup>uaDf5</sup> occurs more effectively  
447 during transmission from older mothers with high burden of the defective mtDNA.

448 Previous reports demonstrated that UPR<sup>MT</sup> limits *uaDf5* clearance, and that eliminating  
449 the UPR<sup>MT</sup>-mediating transcription factor, ATFS-1, lowers mtDNA<sup>uaDf5</sup> abundance [25,27]. Our  
450 identification of a second mutation in the *uaDf5* mutant that results in premature truncation of  
451 the ND4 gene product raises the possibility that expression of both the truncated ND4 and the  
452 ND1-CYTB fusion protein might together activate UPR<sup>MT</sup>. The possibility that it is the production

453 of aberrant polypeptides resulting from these mutations that trigger this response will require  
454 analysis of additional mtDNA mutants.

455

#### 456 **Mitochondrial deletion mutant *uaDf5* as a model for mitochondrial disease**

457 We found that *uaDf5* affects brood size, embryonic lethality, and developmental rate,  
458 highlighting its use as a model for investigating mitochondrial diseases. The reduced brood size  
459 in *uaDf5*-bearing animals might reflect diminished germ cell proliferation, as mitochondria have  
460 been implicated in progression of germline maturation [93,94]. Alternatively, the defective  
461 mtDNA might trigger hyperactivation of the germline PCD pathway that specifically removes  
462 germ cells with the highest burden of defective mtDNA, as suggested by our results, resulting in  
463 the survival of fewer mature oocytes. The increased embryonic lethality in the *uaDf5* strain may  
464 be a consequence of a genetic bottleneck effect, leading to rapid differences in mtDNA allele  
465 frequencies [95–97] and a subpopulation of oocytes containing levels of mtDNA<sup>*uaDf5*</sup> that exceed  
466 a threshold required for viability.

467 We were surprised to find, in contrast to a previous report [98], that mtDNA<sup>*uaDf5*</sup> did not  
468 alter lifespan. Given that mitochondrial mutations are often coupled with compensatory  
469 mutations in the nuclear genome [99–103], one possible explanation for this discrepancy might  
470 be that a compensatory nuclear mutation exists in the strain analyzed, diminishing the impact of  
471 the defective mitochondrial genome. We note, however, that we backcrossed the *uaDf5* strain  
472 extensively to the laboratory reference strain N2 prior to performing the reported analyses. It is  
473 conceivable that although we observed no effect in the lab, *uaDf5* might alter lifespan under  
474 natural conditions. Exposure to increased stress from growth in the wild might be less tolerated

475 in animals bearing mtDNA<sup>uaDf5</sup>, as has been observed with other mitochondrial mutants [104],  
476 resulting in diminished lifespan.

477

#### 478 **Caspases and cell death machinery regulate mitochondrial purifying selection**

479 Our results lend support to the hypothesis that germline PCD mechanisms may be used  
480 to cull germline cells with defective mtDNA (Fig. 6A). Developmentally programmed cell death  
481 and cell death in response to genotoxic stress are mediated by caspases upon activation by the  
482 *C. elegans* octameric apoptosome which is formed when the inhibition of CED-4 by CED-9 is  
483 disrupted through binding of BH-3-only proteins EGL-1 and CED-13 in the soma and germline,  
484 respectively. We propose that in response to mitochondrial genotoxic stress (increased  
485 mtDNA<sup>uaDf5</sup> load), caspases CED-3 and CSP-1 are activated by the BH-3 only domain protein CED-  
486 13 thereby triggering mitochondrial purifying selection independent of CED-9 and the CED-4  
487 apoptosome, either through germ cell PCD or a non-apoptotic role of these caspases (Fig. 6A).

488 Mutations that eliminate the function of caspases that act in PCD result in elevated  
489 mtDNA<sup>uaDf5</sup> levels. Two mutations affecting the p15 domain of the CED-3 caspase result in a  
490 significantly increased molar ratio of *uaDf5*, highlighting the importance of the p15 domain in  
491 mtDNA quality control. It is noteworthy that the two mutations that result in a more substantial  
492 effect on mtDNA<sup>uaDf5</sup> abundance affect CED-3 structure more dramatically: *ced-3(n717)* results in  
493 a splicing error, and *ced-3(n1286)* is a nonsense mutation [54]. In contrast, *ced-3(n2454)*, which  
494 results in a subtle (statistically insignificant) increase in mtDNA<sup>uaDf5</sup>, is a substitution predicted to  
495 impart a much weaker effect on the protein structure [54]. The effect of the *ced-3(n718)* allele,  
496 which resides in the prodomain of CED-3, suggests that that portion of the protein may act to



497 inhibit mtDNA quality control. Taken together, our results suggest that CED-3 may carry out a  
498 specialized activity in mtDNA-activated PCD. We found that a second caspase, CSP-1, which plays  
499 a minor role in PCD [56,57], is also required in mtDNA quality control: a *csp-1(-)* knockout  
500 mutation results in increased abundance of mtDNA<sup>uaDfs</sup> and enhances the effect of *ced-3(n717)*,  
501 suggesting that CSP-1 may play a larger role in removal of defective mtDNA than it does in other  
502 forms of PCD. An exciting possibility is that caspases act in mtDNA quality control via a mechanism  
503 that is distinct from their normal action in PCD. Such putative roles for caspases and other  
504 mitochondrial factors in non-apoptotic mitochondrial quality control may have been co-opted  
505 during metazoan evolution with the innovation of PCD.

506         Analysis of additional PCD components further implicate a role for germline PCD in  
507 mitochondrial purifying selection. These include CED-13, the germline-specific PCD effector, and  
508 components of the cell corpse engulfment pathway, which activate PCD likely through a complex  
509 feedback mechanism that ensures cells destined to die proceed irreversibly through the process  
510 [66,67]. In all cases, mutations in these components result in increased mtDNA<sup>uaDfs</sup> levels. In  
511 vertebrates, mitochondrial reactive oxygen species (mtROS) trigger apoptosis via the intrinsic  
512 mitochondrial pathway [120]. Interestingly, elevated mtROS promotes longevity that is in part  
513 dependent on the core cell death machinery in *C. elegans*, involving CED-9, CED-4, CED-3 and  
514 CED-13, but not EGL-1 [105]. In that study, the authors reported that the protective effect of the  
515 cell death machinery on lifespan was independent of PCD in the soma; however, germline cell  
516 death was not characterized. Given that CED-13, and not EGL-1, is the predominant BH3-domain  
517 protein functioning in the germline [58] and that ablation of the germline leads to extended  
518 lifespan [106], our findings support the possibility that germline progenitors carrying defective

519 mitochondria selectively undergo PCD, ensuring homeostatic mtDNA copy number and health of  
520 progeny.

521         A striking exception to our findings was seen with mutations that eliminate the function  
522 of the pro-apoptotic regulator CED-4. Neither the *ced-3(n718)* mutation that disrupts the CED-3  
523 CARD domain, which is involved in recruitment to the apoptosome by stabilizing its interaction  
524 with CED-4 [44,107], nor two *ced-4(-)* mutations, result in increased accumulation of mtDNA<sup>*uadJ5*</sup>,  
525 suggesting non-canonical, CED-4-independent activation of CED-3 in mitochondrial purifying  
526 selection. It is possible that the CARD mutation (G65R) in the *ced-3(n718)* mutant [54] reduces  
527 the fraction of CED-3 in complex with the apoptosome, which might release more of the protein  
528 for its role in mitochondrial purifying selection. Interestingly, the CARD linker domain has been  
529 found to have an inhibitory effect on the pro-caspase-9 zymogen [108]. *ced-3(n718)* could be  
530 effectively acting as a gain-of-function allele in the process of purifying selection, reflected by the  
531 lower levels of mtDNA<sup>*uadJ5*</sup> in this mutant background.

532         It is noteworthy that CED-4 and its mammalian Apaf1 relatives regulate a variety of  
533 cellular functions that are unrelated to their activities in PCD. These include cell growth control  
534 influenced by DNA damage, centrosomal function and morphology, neuronal regeneration, and  
535 inhibition of viral replication [109–112]. In addition, as a result of differential RNA splicing, *ced-4*  
536 encodes proteins with opposing activities, generating both an activator and a repressor of  
537 apoptosis [113], which further complicates analysis of its action. Thus, it is conceivable that CED-  
538 4 might exert opposing effects on purifying selection, reflecting its pleiotropic activities in  
539 development and confounding an unambiguous interpretation of its action in this process.

540

541 **IIS and CLK-1 synergistically regulate germline accumulation of mtDNA<sup>uaDf5</sup> as adults age**

542 We found that most of the increase in the fractional abundance of mtDNA<sup>uaDf5</sup> as worms  
543 age throughout the period of self-fertility (days 1-4) occurs in the germline. However, the relative  
544 amount of the defective mtDNA continues to increase in older animals when the germline is no  
545 longer actively proliferating [76], suggesting that mtDNA proliferation also occurs in somatic  
546 tissues throughout the aging process. This behavior mirrors the dynamics of mutant mtDNAs  
547 observed in other organisms, including human, mouse, rat, and rhesus monkey [35,73,79]. While  
548 removal of the germline in worms results in extended lifespan [114,115], it is not clear whether,  
549 or to what extent, this increased lifespan might be attributable to accumulation of mutant  
550 mtDNA, since the lack of germline leads to a variety of cellular responses [116,117], any of which  
551 might lead to lifespan extension.

552 These studies do not reveal whether, or how, aging and accumulation of defective mtDNA  
553 are causally linked. However, our findings that steady-state levels of mtDNA<sup>uaDf5</sup> are lowered in  
554 long-lived mutants (*daf-2* (IIS pathway; [28]) and *clk-1* (mitochondrial function; [118,119])) and  
555 that rates of its accumulation are strongly inversely correlated with lifespan extension through  
556 independent pathways, suggests that mtDNA purifying selection mechanisms are influenced by  
557 aging programs (Fig. 6A). Further bolstering this potential link is our finding that short-lived  
558 mutants (*daf-16* and *aak-2*, both involved in the IIS pathway [28]), show higher steady-state levels  
559 of mtDNA<sup>uaDf5</sup>. That this effect is greater in *aak-2* mutants than in *daf-16* mutants suggests that  
560 the AAK-2 branch of the IIS pathway influences mtDNA quality control more significantly than  
561 does the DAF-16 branch. One of the substrates of AAK-2 is SKN-1/Nrf2, a multifaceted  
562 transcription factor with roles in stress response and longevity, and one of its isoforms, SKN-1a,

563 localizes to the mitochondrial surface [120], raising the possibility that AAK-2 might influence  
564 clearance of defective mtDNA through SKN-1 action. It will be of interest to assess how defective  
565 mtDNA might coordinately trigger quality control and stress-response pathways.

566 Our observation that IIS pathway components and CLK-1 act synergistically on the mtDNA  
567 quality control machinery raises the possibility that these two distinct lifespan-regulating  
568 pathways converge on a common system for removal of defective mtDNA, such as a global  
569 mitochondrial stress response pathway. Candidates for mediating this removal process include  
570 mitochondrial fission/fusion [17,20,121], mitophagy [18,19,122], and the UPR<sup>MT</sup> [22–27], all of  
571 which are known to act in mtDNA quality control, as well as modulation of the regulatory  
572 pathway for PCD, as suggested by our findings.

573

574 **PCD is uncoupled from aging during intergenerational mitochondrial purifying selection in**  
575 **older mothers**

576 Analysis of newly hatched L1 larvae revealed that the relative load of mtDNA<sup>uaDf5</sup> is  
577 transmitted from mother to offspring, with evidence for intergenerational purifying selection  
578 (Fig. 6B). This finding implies that mtDNA quality control occurs between germline stem cell  
579 expansion in the mature female germline and L1 hatching, a developmental period that spans  
580 many potential stages at which it might occur, including germline PCD, oocyte maturation, and  
581 the entirety of embryogenesis. It is conceivable that this selection process acts at multiple stages  
582 throughout this developmental window and that the decreased burden of defective mtDNA in  
583 newly hatched L1 larvae reflect the summation of a series of sequentially acting processes that  
584 incrementally enrich for healthy mtDNA.

585           The efficacy of intergenerational removal of mtDNA<sup>uaDf5</sup> increases in old mothers,  
586 including in strains lacking pro-apoptotic regulators. The clearance is particularly precipitous in  
587 strains with a very high burden of defective mtDNA as seen in the absence of CED-13, CED-10,  
588 and ATFS-1, suggesting a critical threshold beyond which a germline PCD-independent mtDNA  
589 quality control process may be triggered in these older mothers (Fig. 6B). One possible  
590 explanation for this observation is that an mtDNA purifying selection mechanism that is typically  
591 inhibited by germline PCD might be activated in older mothers. This hypothesized purifying  
592 selection mechanism might be triggered by the unique cellular environment associated with  
593 aging such as increased organelle or macromolecule damage. Alternatively, the effect might be  
594 the result of an age-dependent genetic program.

595           While our study has uncovered new mechanisms acting in mtDNA purifying selection and  
596 its relationship to aging, it is of note that some level of mtDNA<sup>uaDf5</sup> is maintained in all but the  
597 most extreme conditions we have observed (e.g., in the *daf-2(e1391) clk-1(qm30)* double  
598 mutant, in which the defective mtDNA is extirpated). This finding raises the possibility that  
599 some degree of heteroplasmy, even with defective mtDNA, is not only tolerated, but may be  
600 adaptive by providing a degree of evolutionary plasticity. Cells might purposefully allow for  
601 limited heteroplasmy as a way of increasing genetic heterogeneity that might prove  
602 evolutionarily advantageous. Such heterogeneity may also be essential to allow mtDNA to co-  
603 evolve with changes arising in the nuclear genome. It may be that a dynamic balance between  
604 active mtDNA purifying selection, including the mechanisms identified here, and the  
605 permissibility of limited heteroplasmy, is modulated according to environmental or  
606 physiological demands.

607 **Materials and Methods**

608

609 **Culturing of nematodes**

610 Nematode strains were maintained on NGM plates as previously described at either 20°C  
611 or 15°C for the temperature-sensitive strains [123]. Supplementary Tables 1, 2 and 3 provide  
612 details of all strains used in this study. Strains without a JR designation were either provided by  
613 the CGC which is funded by NIH Office of Research Infrastructure Programs (P40 OD010440) or  
614 were obtained from the Mitani lab (strains with a FX designation or JR strains containing alleles  
615 with a tm designation were generated from Mitani lab strains) [124].

616 **Population collection by age**

617 Upon retrieval of a stock plate for a given strain, three chunks were taken from the stock  
618 plate and placed onto three separate large NGM plates to create three biological replicates  
619 (“lines”). Each of these lines was chunked approximately each generation to fresh large NGM  
620 plates (every 3 days if maintained at 20°C or 25°C, or every four days if maintained at 15°C, being  
621 careful to not let the worms starve between chunks). After four generations of chunks, an egg  
622 prep was performed on each line (as described previously; [123]) and left to spin in M9 overnight  
623 to synchronize the hatched L1s. The next day, each egg prep was plated onto three large seeded  
624 plates at an equal density and the worms were left to grow to day 2 adults (second day of egg  
625 laying). The day 2 adult worms were egg prepped for synchronization and left to spin in M9 buffer  
626 overnight. The next day, each egg prep was plated onto five large NGM plates at equal density.  
627 Once the worms reached day 1 of adulthood (first day of egg-laying), one of the plates was used  
628 to collect 200 adult worms by picking into 400 µl of lysis buffer, and the remaining adults on the  
629 plate were egg prepped for the collection of hatched L1 larvae in 400 µl lysis buffer the following

630 day. The worms on the four remaining plates were transferred to a 40 µm nylon mesh filter in  
631 order to separate the adults from the progeny, and the resulting adults were resuspended in M9  
632 and pipetted onto fresh large NGM plates. This process was repeated for the following three days  
633 (Day 2-4 of adulthood). Day 5-10 adults were moved to fresh NGM plates every 2<sup>nd</sup> day using a  
634 40 µm nylon mesh filter, and the resulting day 10 adults were collected in lysis buffer.

### 635 **ddPCR**

636 The worm lysates were incubated at 65°C for 4 hours and then 95°C for 30 minutes to  
637 deactivate the proteinase K. Each lysate was diluted; 100-fold for 200 worm adult population  
638 lysates, 2-fold for 200 worm L1 population lysates, and 25-fold for individual adult lysates. 2 µl of the  
639 diluted lysate was then added to 23 µl of the ddPCR reaction mixture, which contained a  
640 primer/probe mixture and the ddPCR probe supermix with no dUTP. The primers used were:

641 WTF: 5'-GAGGGCCAACACTATTGTTAC-3'

642 WTR: 5'-TGGAACAATATGAACTGGC-3'

643 UADF5F: 5'-CAACTTTAATTAGCGGTATCG-3'

644 UADF5R: 5'-TTCTACAGTGCATTGACCTA-3'

645 The probes used were:

646 WT: 5'-HEX-TTGCCGTGAGCTATTCTAGTTATTG-Iowa Black® FQ-3'

647 UADF5: 5'-FAM-CCATCCGTGCTAGAAGACAAAG-Iowa Black® FQ-3'

648 The ddPCR reactions were put on the BioRad droplet generator and the resulting droplet-  
649 containing ddPCR mixtures were run on a BioRad thermocycler with the following cycle  
650 parameters, with a ramp rate of 2°C/sec for each step:

651 1. 95°C for 5 minutes

652 2. 95°C for 30 seconds

653 3. 60°C for 2 minutes

654 4. Repeat steps 2 and 3 40x

655 5. 4°C for 5 minutes

656 6. 90°C for 5 minutes

657 After thermocycling, the ddPCR reaction plate was transferred to the BioRad droplet reader and  
658 the QuantaSoft software was used to calculate the concentration of mtDNA<sup>uaDfs</sup> (FAM positive  
659 droplets) and mtDNA<sup>WT</sup> (HEX positive droplets) in each well.

#### 660 **Lifespan analysis**

661 Confluent large plates were egg prepped and left to spin in M9 overnight for  
662 synchronization. The hatched L1s were plated onto large thick plates and allowed to grow to day  
663 2 adults before being egg prepped a second time and left to spin in M9 overnight. The next  
664 morning, referred to as day 1 for lifespan determination, L1s were singled out onto small plates.  
665 Once the worms started laying eggs, they were transferred each day to a fresh small plate until  
666 egg laying ceased, after which the worms remained on the same plate unless bacterial  
667 contamination required transfer to a fresh plate. Worms were considered dead if there was no  
668 movement after being lightly prodded with a worm pick. Worms that died due to desiccation on  
669 the side of the plate were excluded from analysis.

#### 670 **Brood size and embryonic lethality analysis**

671 Confluent large plates were egg prepped and left to spin in M9 overnight for  
672 synchronization. The hatched L1s were plated onto large thick plates and allowed to grow to day  
673 2 adults before being egg prepped a second time and left to spin in M9 overnight. The next



674 morning, L1s were singled out onto small plates. Once the worms started laying eggs, they were  
675 transferred each day to a fresh small plate until egg laying ceased. The day after transfer to a  
676 fresh plate, unhatched embryos and hatched larvae on the plate from the previous day were  
677 counted. This was done for each of the days of laying and the total of unhatched embryos and  
678 hatched larvae from all plates from a single worm were tabulated to determine total brood size.  
679 To determine embryonic lethality, the total number of unhatched embryos was divided by the  
680 total brood size. Worms that died due to desiccation on the side of the plate were excluded from  
681 analysis.

### 682 **Developmental time course analysis**

683 Confluent large plates were egg prepped and left to spin in M9 overnight for  
684 synchronization. The hatched L1s were plated onto large thick plates and allowed to grow to day  
685 2 adults before being egg prepped a second time and left to spin in M9 overnight. The next  
686 morning, L1s were singled out onto small plates. The stage of the worms was assayed every 12  
687 hours for the first 72 hours after plating. For determining the stage at 60 hours, L4 worms were  
688 divided up into three subgroups based on morphology: young-L4, mid-L4, and late-L4; otherwise,  
689 all other staged worms were not divided up into subgroups. Worms that died due to desiccation  
690 on the side of the plate were excluded from analysis.

### 691 **Genotyping the *w47* allele**

692 DNA was collected from reference strain (N2) and two *uaDf5*-containing strains, LB138  
693 and JR3630. Mitochondrial DNA was extracted and the DNA libraries were prepared using  
694 Nextera Kit and then sequenced using an Illumina NextSeq500. Prior to alignment, reads from  
695 fastq files were trimmed using Trimmomatic. Trimmed, pair-end reads (2x150) were then

696 mapped to the *C. elegans* assembly reference sequence WBcel235 using Burrows-Wheeler  
697 Aligner (BWA) [125]. Picard Tools (<http://broadinstitute.github.io/picard/>) was used to mark  
698 duplicate reads, and SAMtools [126] was used to merge, index and create pile-up format. VarScan  
699 [127] was used to call variants, and only variants with minimum coverage of 100 and a minimum  
700 variant frequency call of 0.01 were considered for analysis.

## 701 **Statistical Analysis**

702 Summary statistics, ANOVA, Mann-Whitney tests, and linear regression were calculated  
703 using R v3.4.1. The details of the statistical tests are reported in the figure legends.

704

705 **Figures**

706 **Figure 1**

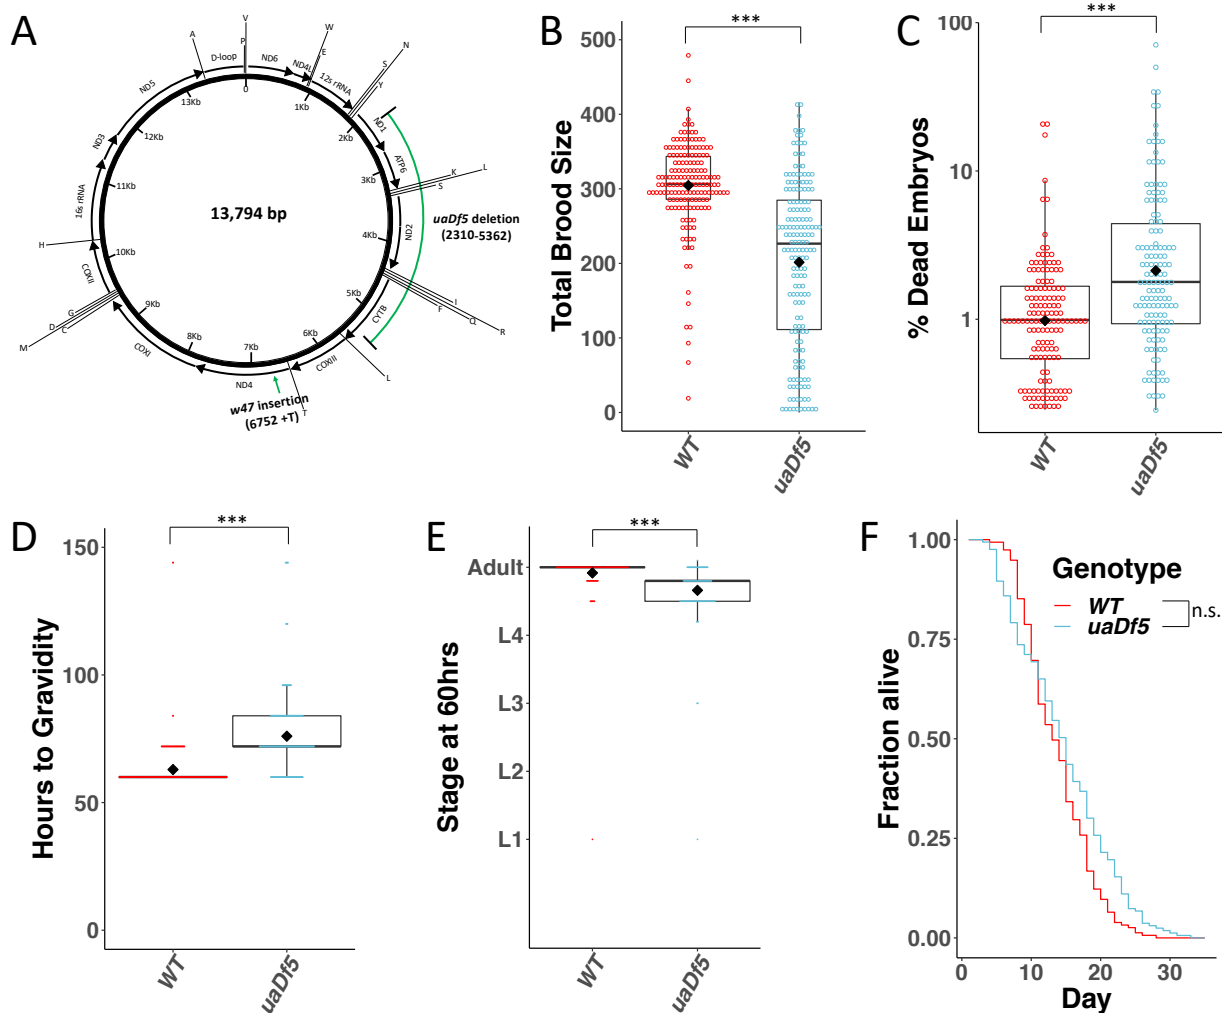

707  
 708 **Figure 1: Analysis of the impact of mtDNA<sup>uaDf5</sup> on fitness parameters. (A)** Diagram of *C. elegans*  
 709 mtDNA. Black bars with arrows indicate the locations of genes and direction of transcription.  
 710 Black lines with letters indicate the locations of tRNAs. Green bars show the locations of the  
 711 mtDNA<sup>uaDf5</sup> deletion as well as the linked *w47* insertion that was identified via Illumina  
 712 sequencing. **(B)** Brood size analysis of mtDNA<sup>uaDf5</sup> compared to laboratory wildtype N2. **(C)**  
 713 Embryonic lethality analysis of *uaDf5* compared to laboratory wildtype N2. **(D)** Developmental  
 714 rate analysis of mtDNA<sup>uaDf5</sup> compared to laboratory wildtype N2, counting how many hours it

715 takes for starved L1s to reach gravidity once plated on food. **(E)** Developmental rate analysis of  
716 mtDNA<sup>uaDf5</sup> compared to laboratory wildtype N2, staging worms 60 hours after synchronized,  
717 staved L1s are plated on food. **(F)** Survival curve analysis of mtDNA<sup>uaDf5</sup> compared to laboratory  
718 wildtype N2, day 1 is defined as the day starved L1s are plated on food. Median lifespan and  
719 statistics are presented in Supplemental Figure 2. For **B-E**, box plots show median and IQR, and  
720 the diamond indicates the mean. Statistical analysis was performed using the Mann-Whitney  
721 test. (\*\*\*)  $p < 0.001$ , n.s. not significant).

722

723 **Figure 2**

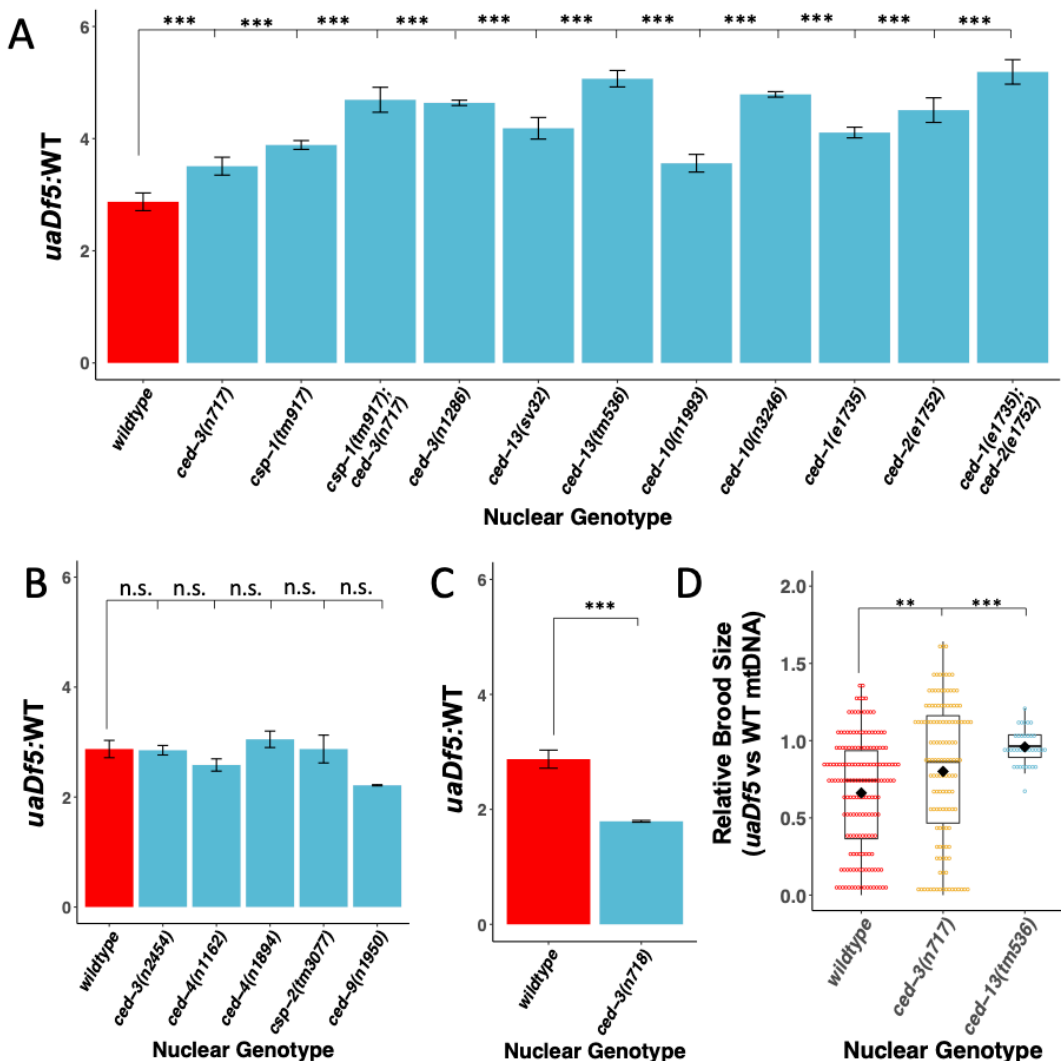

724  
725

726 **Figure 2: Regulators of PCD act on mutant mtDNA. (A-C)** ddPCR analysis of the steady-state  
727 molar ratio of mtDNA<sup>uaDf5</sup> in 200 worm populations of day 1 adults of various PCD mutant  
728 backgrounds. **(A)** PCD mutants that result in a significant increase in the molar ratio of  
729 mtDNA<sup>uaDf5</sup>. **(B)** PCD mutants that result in no statistical change in the molar ratio of mtDNA<sup>uaDf5</sup>.  
730 **(C)** PCD mutant that results in a significant decrease in the molar ratio of mtDNA<sup>uaDf5</sup>. **(D)** The  
731 relative brood size of the animals with and without mtDNA<sup>uaDf5</sup> in the indicated mutant  
732 backgrounds. For each nuclear genotype shown, the brood size of *uaDf5*-containing worms was

733 normalized by dividing by the average brood size of worms containing only *WT-mtDNA*. Box plots  
734 show the median and IQR, the diamond indicates the mean. For **A-C**, n=3 or more biological  
735 replicates of 200 worm populations were performed for each genotype. Statistical analysis was  
736 performed using one-way ANOVA with Dunnett's correction for multiple comparisons. For **D**,  
737 statistical analysis was performed using the Mann-Whitney test. Error bars represent SEM. (\*\*\*)  
738  $p < 0.001$ , \*\*  $p < 0.01$ , \*  $p < 0.05$ , .  $p < 0.1$ , n.s. not significant).  
739

740 **Figure 3**

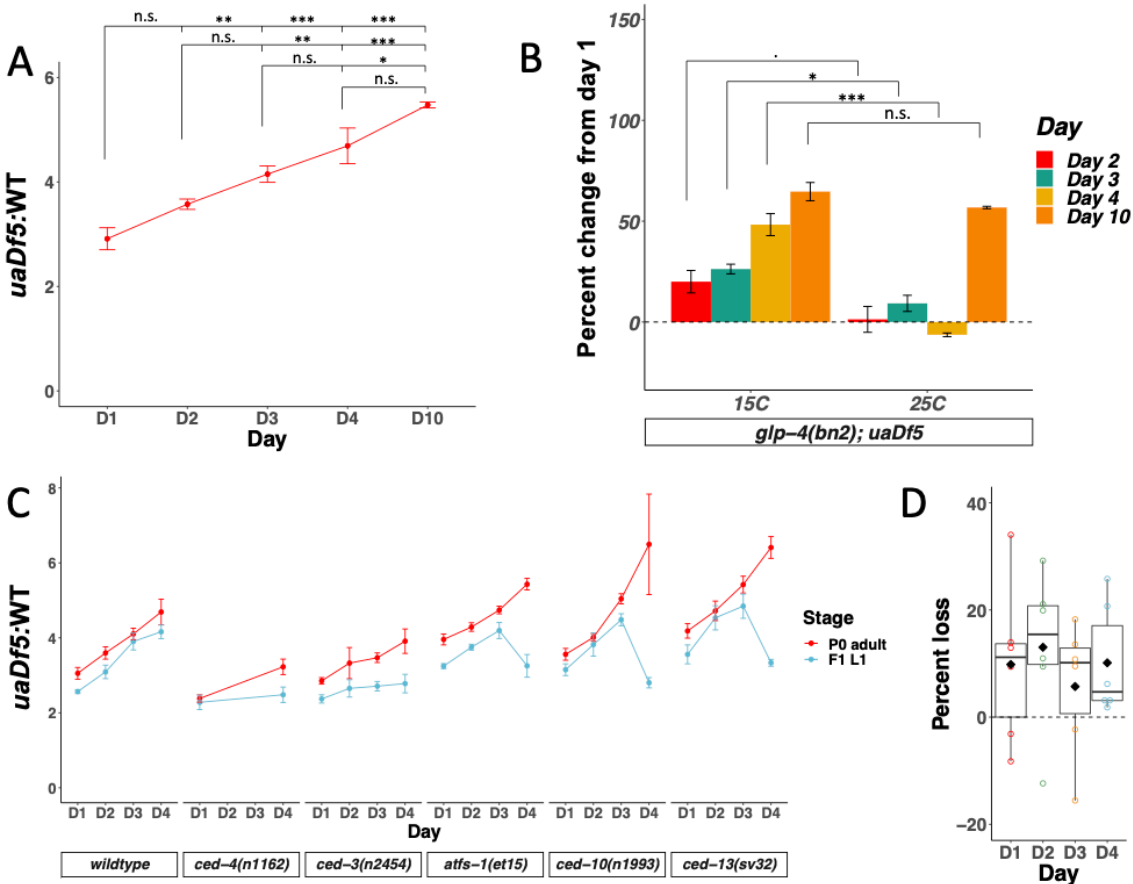

741 **Figure 3: mtDNA<sup>uaDf5</sup> accumulates in the germline of aging adults, and evidence of purifying**  
742 **selection between mother and offspring. (A)** Analysis of the molar ratio of mtDNA<sup>uaDf5</sup> in aging  
743 adults in a wildtype nuclear background. **(B)** Analysis of the percent change of *uaDf5:WT* from  
744 day 1 (Y axis = (*uaDf5:WT* day x - *uaDf5:WT* day 1) / (*uaDf5:WT* day 1)). For *glp-1(q231ts)*, *fem-*  
745 *3(q20ts)*, and *glp-4(bn2ts)*, 15°C is the permissive temperature (germline development occurs)  
746 and 25°C is the restrictive temperature (female germline development is inhibited). Statistical  
747 analysis was performed using one-way ANOVA with Tukey correction for multiple comparisons.  
748 (\*\*\*) p < 0.001, \*\* p < 0.01, \* p < 0.05, . p < 0.1). Error bars represent SEM. **(C)** Analysis of the  
749 molar ratio of mtDNA<sup>uaDf5</sup> in aging adults (P0 adult) and their L1 progeny (F1 L1) in various nuclear  
750 backgrounds shows that all strains decrease the *uaDf5* load during transmission from mother to  
751

752 offspring, and that strains with significantly higher mtDNA<sup>uaDf5</sup> levels (*atfs-1(et15)*, *ced-*  
753 *10(n1993)*, and *ced-13(sv32)*) have a more significant removal mechanism at day 4 of adulthood.  
754 n=3 or more replicates of 200 worm populations were performed for each timepoint. Error bars  
755 represent SEM. Grey dashed line indicates a hypothetical threshold at which high mtDNA<sup>uaDf5</sup>  
756 burden activates enhanced intergenerational purifying selection in older mothers. **(D)** Analysis  
757 of the measured loss of mtDNA<sup>uaDf5</sup> between mother and offspring at each day of adulthood  
758 shows that mtDNA<sup>uaDf5</sup> removal occurs. n=6 replicates of 200 worm populations for each  
759 condition.  
760



761 **Figure 4**

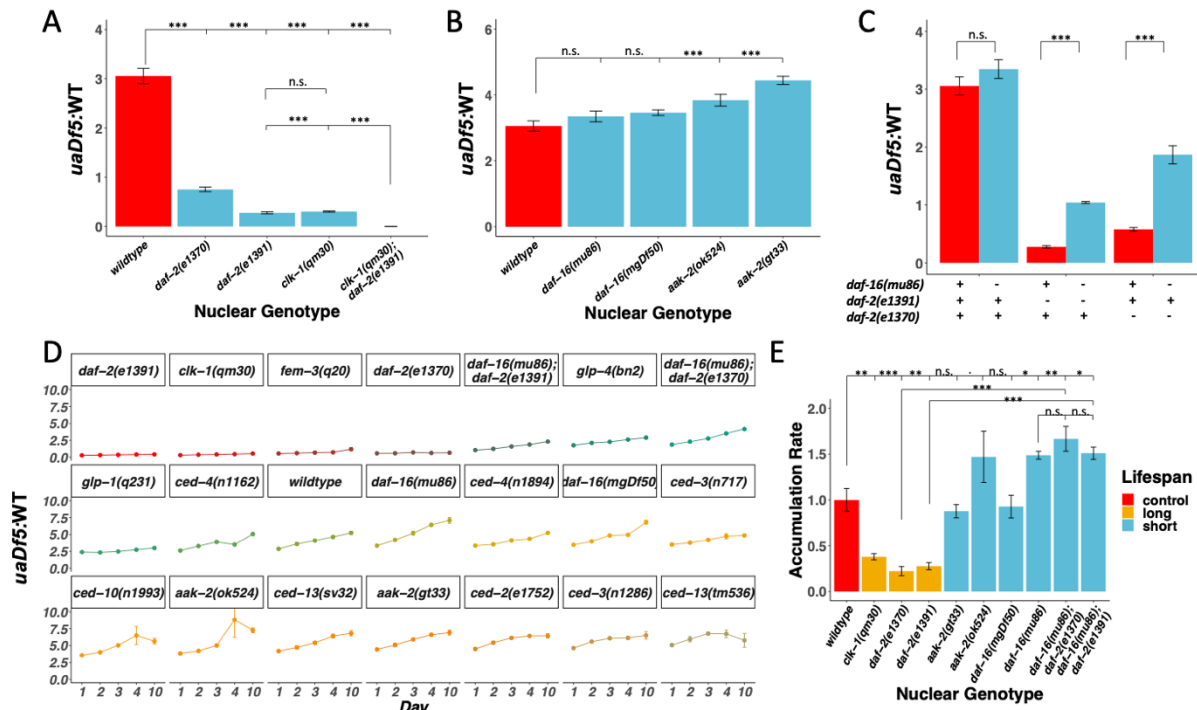

762  
763 **Figure 4: Lifespan mutants have both a lower steady-state level and accumulation rate of**  
764 **mtDNA<sup>uaDf5</sup>.** (A-C) Analysis of molar ratio of mtDNA<sup>uaDf5</sup> in day 1 adults of various mutant  
765 backgrounds. (A) Analysis of steady-state mtDNA<sup>uaDf5</sup> levels in long-lived mutants. (B) Analysis of  
766 steady-state mtDNA<sup>uaDf5</sup> levels in short-lived mutants, showing synergistic activity on mtDNA<sup>uaDf5</sup>  
767 removal capacity in the *daf-2(e1391) clk-1(qm30)* double mutant. (C) Analysis of steady-state  
768 mtDNA<sup>uaDf5</sup> levels in *daf-2(-)* single and *daf-16(-); daf-2(-)* double mutants, showing a partial  
769 rescue of *daf-2(-)* phenotype by *daf-16(-)*. (D) Analysis of the molar ratio of mtDNA<sup>uaDf5</sup> in aging  
770 adults in 21 different nuclear backgrounds shows a consistent accumulation trend. (E) Summary  
771 of the rate of increase for the lifespan regulation mutants, showing that *daf-16* rescues the *daf-*  
772 2 accumulation rate phenotype. The normalized accumulation rate was calculated by fitting a  
773 regression line for each trial and then dividing the slope of the regression line by the slope of the  
774 averaged regression line found in a wildtype background. For all, n=3 or more replicates of 200

775 worm populations for each genotype and stage. For **A and E**, statistical analysis was performed  
776 using one-way ANOVA with Tukey correction for multiple comparisons. For **C**, statistical analysis  
777 was performed using one-way ANOVA. For **B**, statistical analysis was performed using one-way  
778 ANOVA with Dunnett's correction for multiple comparisons. Error bars represent SEM. (\*\*\*)  $p <$   
779  $0.001$ , \*\*  $p < 0.01$ , \*  $p < 0.05$ , .  $p < 0.1$ , n.s. not significant).  
780

781 **Figure 5**

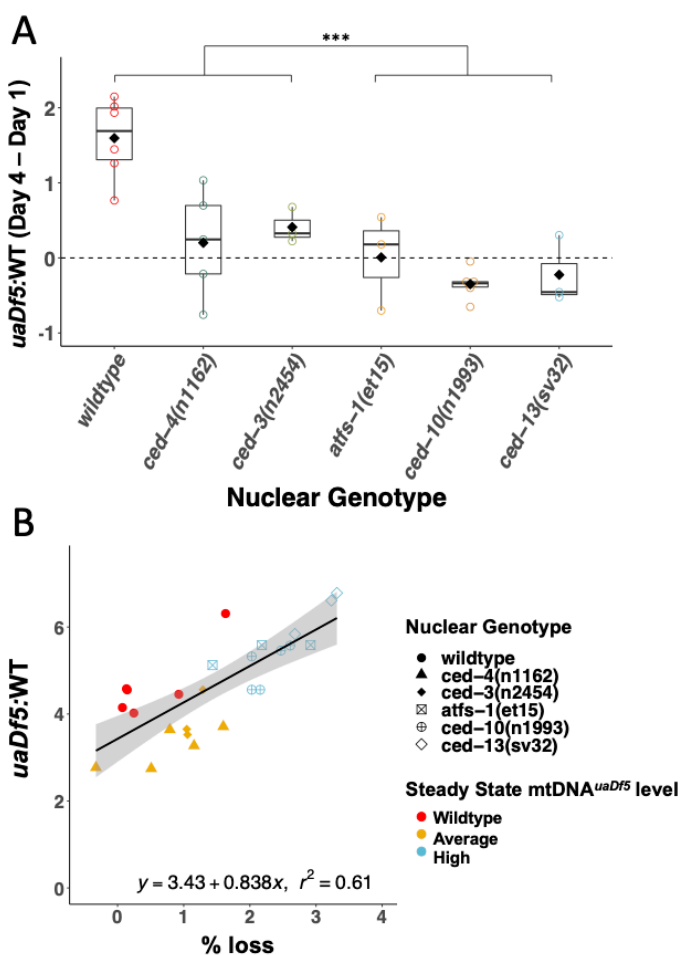

782  
783 **Figure 5: Evidence for late adulthood-specific mechanisms for removal of mtDNA<sup>uaDf5</sup>**

784 **(A)** Subtracting  $uaDf5:WT$  in progeny from day 1 adults from progeny of day 4 adults shows that  
785 day 4 F1-L1s tend to have higher mtDNA<sup>uaDf5</sup> burden than their day 1 siblings, but this is no longer  
786 the case in nuclear backgrounds that result in a significantly higher steady-state levels of  
787 mtDNA<sup>uaDf5</sup> in the adult. n=3 or more replicates for each genotype and statistical analysis was  
788 performed using the Mann-Whitney test. **(B)** Comparison of the molar ratio of mtDNA<sup>uaDf5</sup> in day  
789 4 adult mothers to the absolute % removal of mtDNA<sup>uaDf5</sup> from mother to offspring shows a  
790 positive correlation. (\*\*\*)  $p < 0.001$ .

791  
792

793 **Figure 6**

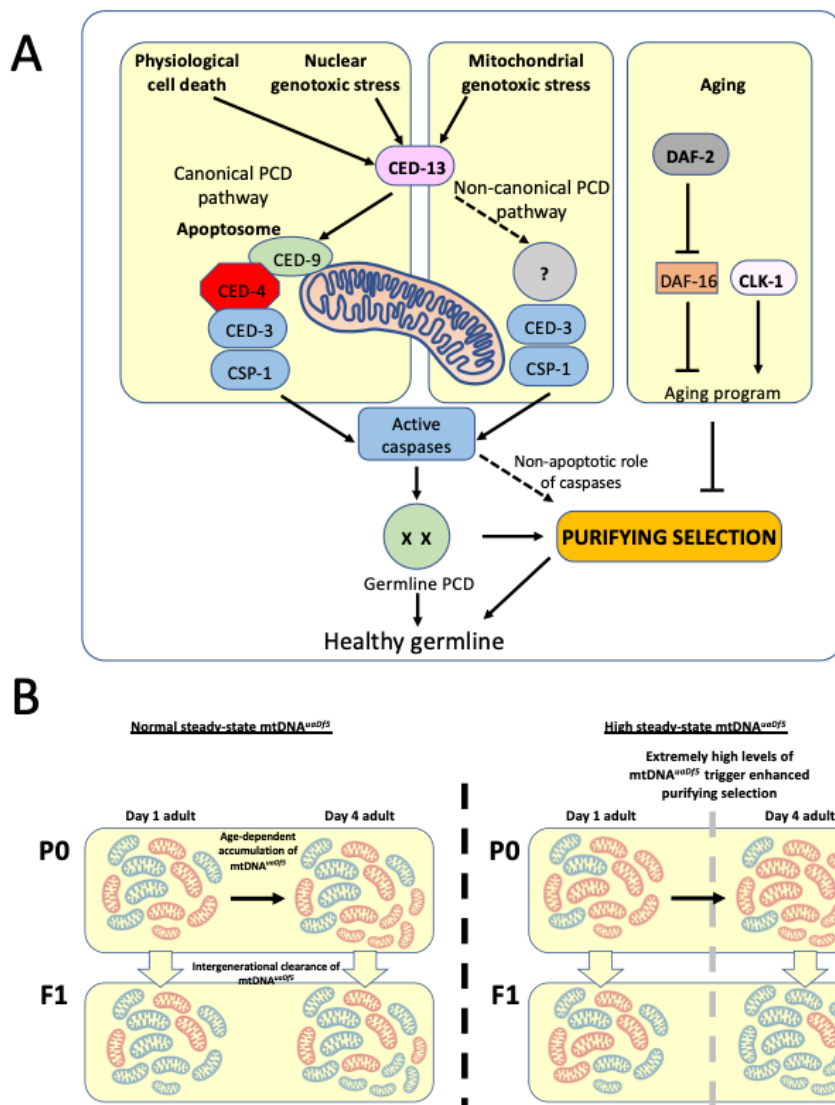

794 **Figure 6: Regulation of mtDNA<sup>uaDf5</sup> accumulation and transmission by the PCD and aging**  
 795 **pathways**

796 **(A)** Our results suggest that CED-3 and CSP-1, which are activated by BH-3 only protein CED-13,  
 797 function cooperatively to promote mitochondrial purifying selection, independent of CED-9 and  
 798 the CED-4 apoptosome. The clearance of mtDNA<sup>uaDf5</sup> may therefore involve induction of a non-  
 799 canonical germline PCD mechanism or non-apoptotic action of the CED-13/caspase axis.  
 800 Additionally, IIS and CLK-1 aging pathways act synergistically to regulate mitochondrial purifying  
 801

802 selection. **(B)** mtDNA<sup>uaDf5</sup> (red) accumulates in the germline relative to mtDNA<sup>WT</sup> (blue) as adults  
803 age and the increased mtDNA<sup>uaDf5</sup> levels are transmitted to the progeny, although the mtDNA<sup>uaDf5</sup>  
804 burden is consistently lower in progeny than mothers. This intergenerational purifying selection  
805 is enhanced in the older mothers of mutants with high steady-state mtDNA<sup>uaDf5</sup> (e.g., *ced-13*, *ced-*  
806 *10*, and *atfs-1*), suggesting a threshold beyond which a germline PCD-independent mtDNA quality  
807 control process may be initiated or enhanced in these older mothers.

808 Supplemental Materials

809 Fig. 1 – figure supplement 1

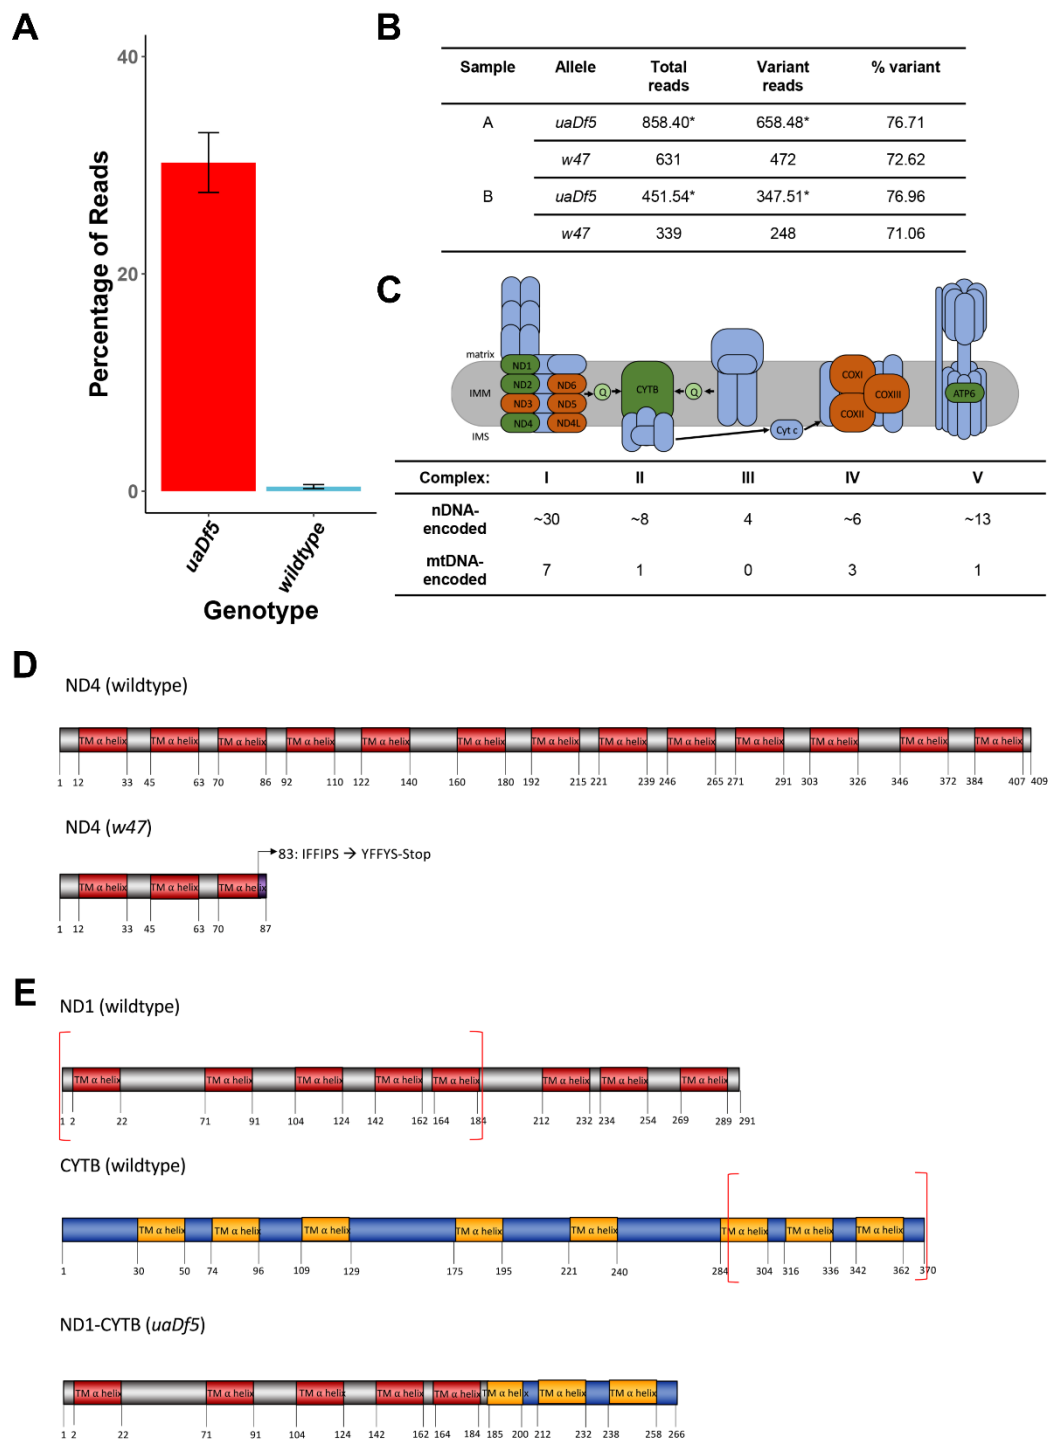

810

811 **Fig. 1 – figure supplement 1: Characterization of the *uaDf5* allele. (A)** The percentage of reads  
812 that mapped to the *w47* insertion in *uaDf5* samples (red) and wildtype samples (blue). Error bars  
813 represent SEM. **(B)** Table outlining the percentage of reads that mapped to the *w47* and *uaDf5*  
814 mutations in *uaDf5* samples. The number of variant reads was determined by averaging the  
815 mapped reads across the deleted region and subtracting that from the average number of reads  
816 mapped to the rest of the mtDNA genome (total reads). **(C)** Diagram showing the mitochondrial  
817 respiratory chain (MRC) machinery subunits. Blue indicates nDNA-encoded subunits, orange and  
818 green indicate mtDNA-encoded subunits. Green indicates those subunits that are knocked out in  
819 the *uaDf5* allele (including ND4 which is knocked out by the linked *w47* mutation). **(D)** Diagram  
820 showing the likely effect of the *w47* mutation on ND4 protein translation. ND4 is a 409-aa long  
821 transmembrane subunit that spans the inner mitochondrial membrane 13 times. The *w47*  
822 mutation results in a premature stop codon at position 89, eliminating 10 of the 13 alpha-helix  
823 membrane domains. **(E)** Diagram showing the likely effect of the *uaDf5* mutation on ND1 protein  
824 translation. ND1 is a 291-aa long transmembrane subunit that spans the inner mitochondrial  
825 membrane 8 times and CYTB is a 370-aa long transmembrane subunit that spans the inner  
826 mitochondrial membrane 8 times. The *uaDf5* mutation results in a 266 amino acid long fusion  
827 protein that connects the first 185 amino acids (and 5 subunits) of ND1 with the last 81 amino  
828 acids (and 3 subunits) of CYTB.  
829

830 **Fig. 1 – figure supplement 2**

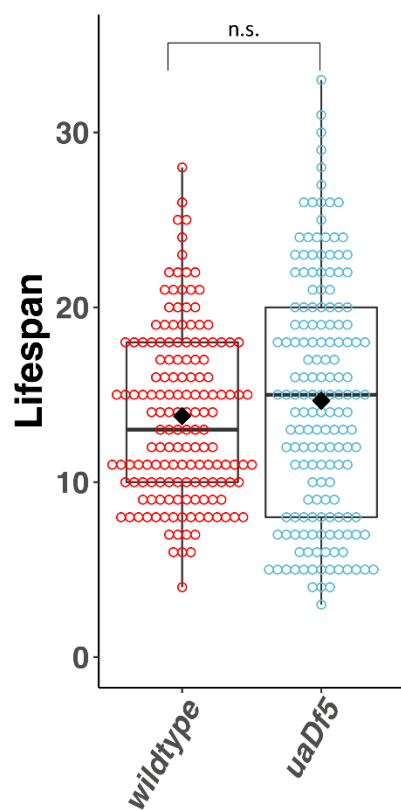

831

832 **Fig. 1 – figure supplement 2: Lifespan analysis of the impact of *uaDf5*.** Lifespan analysis of N2

833 bearing *uaDf5* compared to wildtype N2. Day 1 is defined as the day starved L1s are plated on

834 food. Box plots show median and IQR, and the diamond indicates the mean. Statistical analysis

835 was performed using the Mann-Whitney test. (n.s. not significant).

836



837 **Fig. 2 – figure supplement 1**

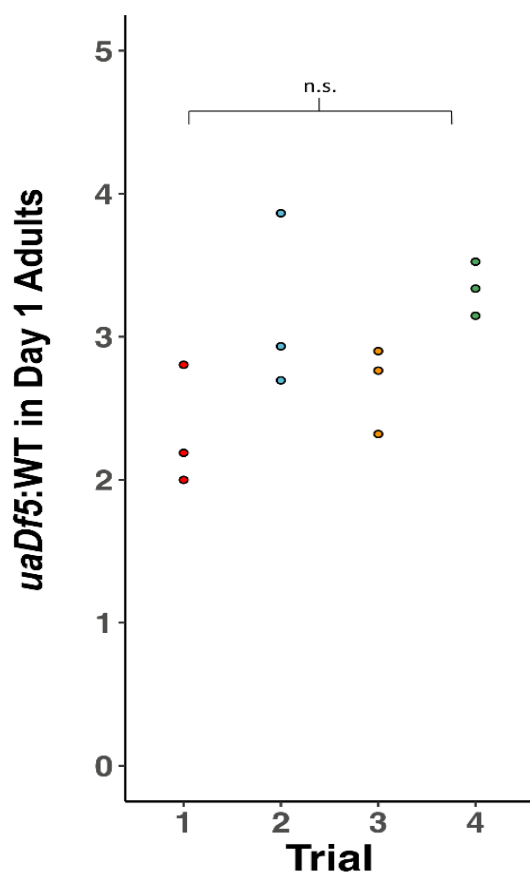

838

839 **Fig. 2 – figure supplement 1: Reproducibility of ddPCR measurement of *uaDf5*.** Analysis of the

840 steady-state of *uaDf5* in a wildtype nuclear background shows highly stable steady-state levels.

841 Trials were done months apart on different thaws. Dots represent biological replicates. Statistical

842 analysis was performed using one-way ANOVA with Tukey correction for multiple comparisons.

843 (n.s. not significant).

844

845 **Fig. 2 – figure supplement 2**

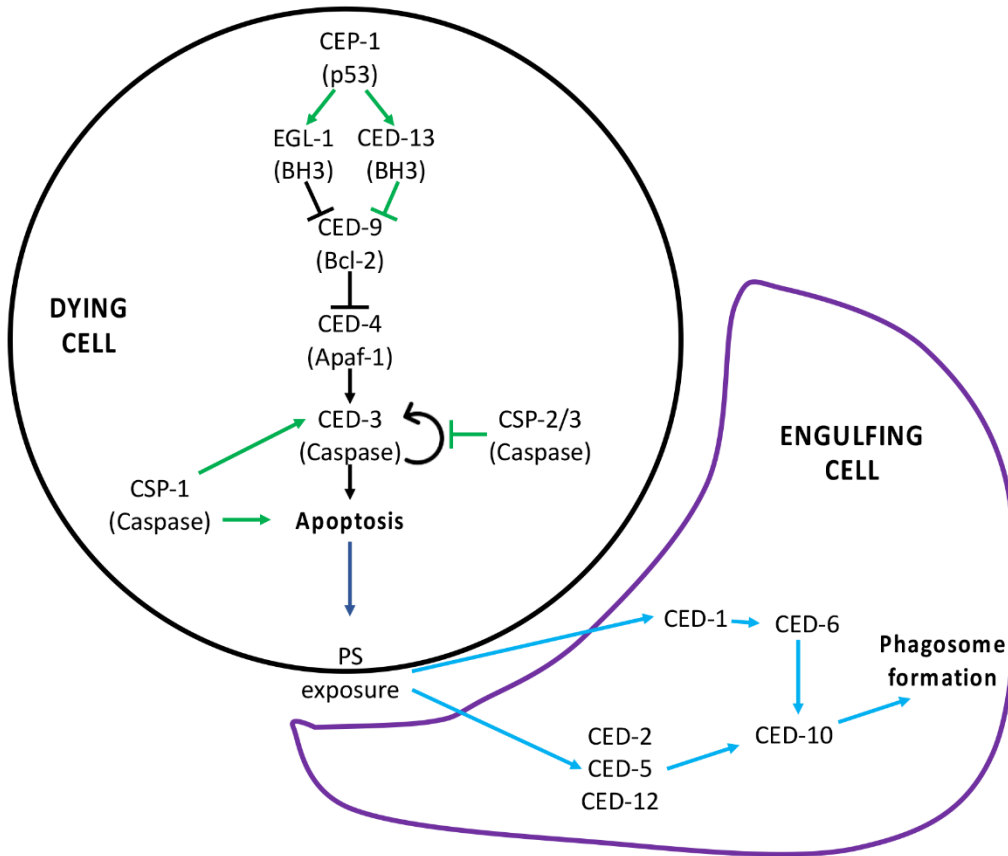

846

847

848 **Fig. 2 – figure supplement 2: PCD Signaling pathway. (A)** Signaling pathway for programmed cell

849 death. The canonical pathway is shown with black arrows, the noncanonical pathway is shown

850 with green arrows, and the downstream engulfment pathway is shown with blue arrows.

851 Adapted from [38].

852

853 **Fig. 2 – figure supplement 3**

**A**

| Allele       | Location                       | Domain    | Level of <i>uaDf5</i> |
|--------------|--------------------------------|-----------|-----------------------|
| <i>n1286</i> | W428opal                       | p15       | highest               |
| <i>n717</i>  | Position 403 - Exon 7 acceptor | p15       | high                  |
| <i>n2454</i> | A466T                          | p15       | unchanged             |
| <i>n718</i>  | G65R                           | Prodomain | low                   |

**B**

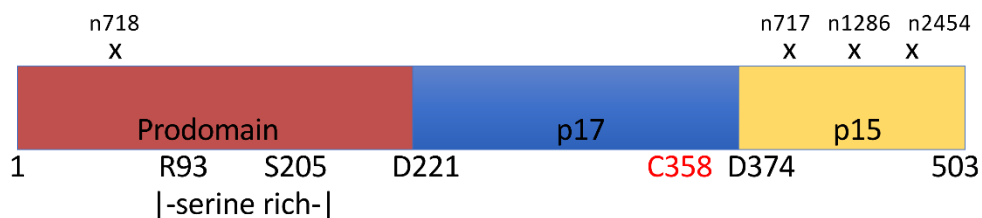

854

855 **Fig. 2 – figure supplement 3: Analysis of the *ced-3* alleles. (A)** Locations and consequences of  
 856 the four tested *ced-3* alleles, as well as the measured fractional abundance of *uaDf5*. **(B)** Diagram  
 857 showing the locations of the mutations for each allele.

858

859 Fig. 2 – figure supplement 4

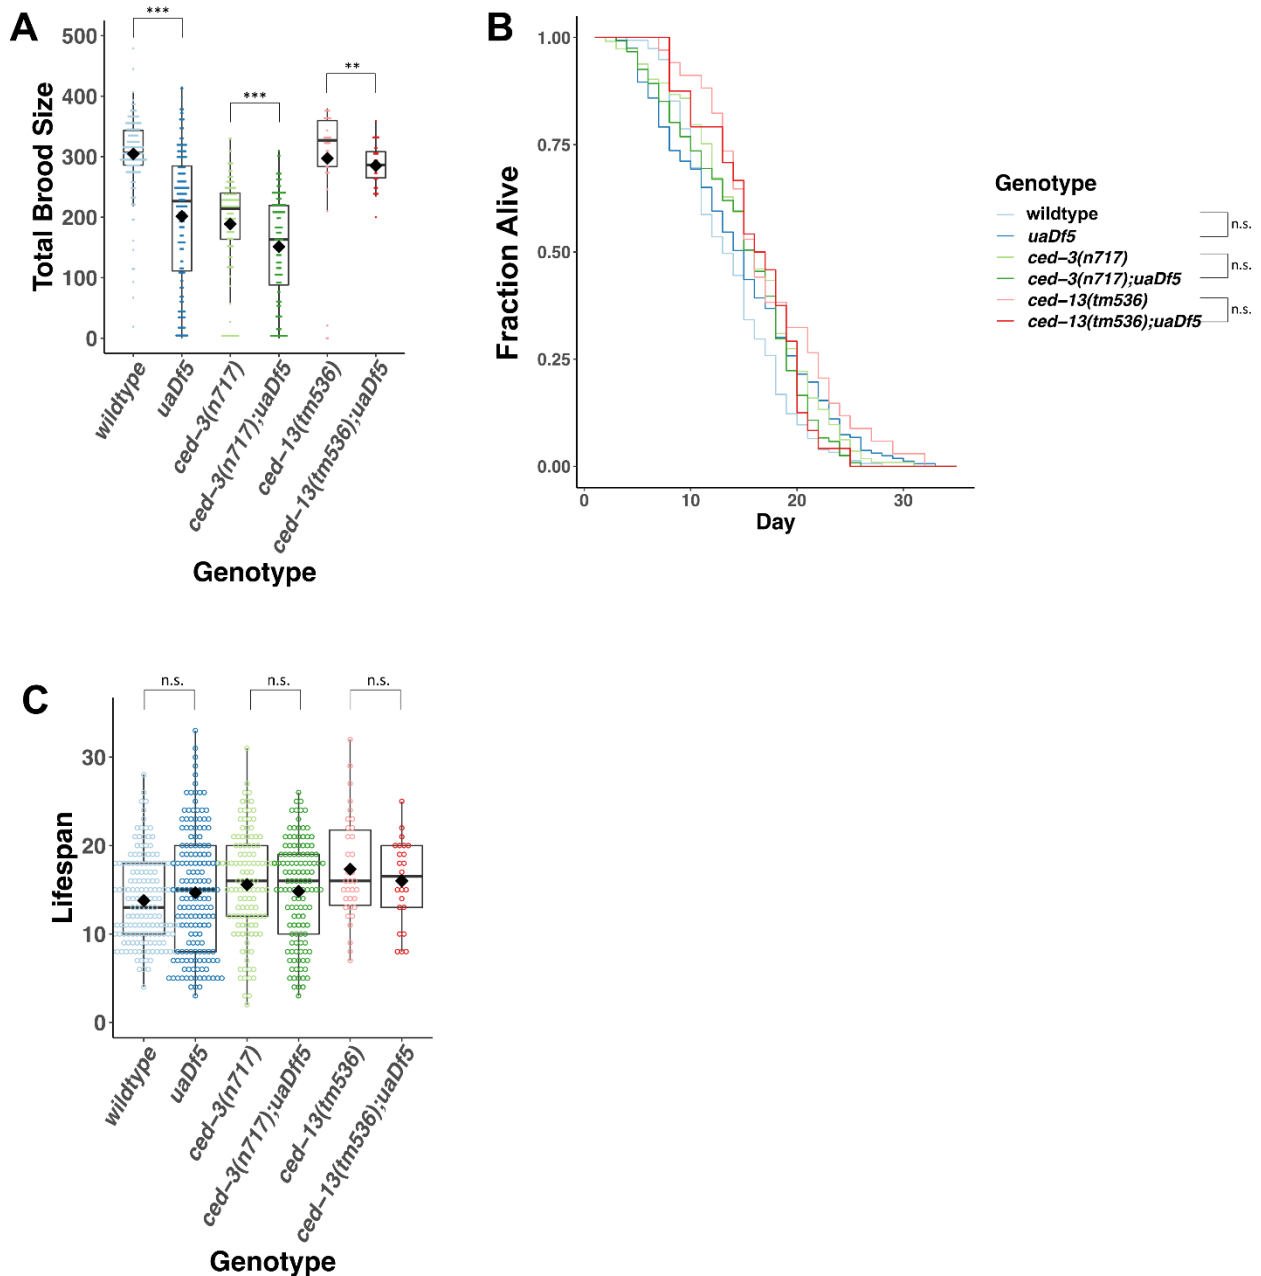

860

861 Fig. 2 – figure supplement 4: Analysis of the impact of *uaDf5* on fitness parameters in PCD

862 mutants. (A) Brood size analysis of PCD mutants. (B) Lifespan analysis shows that *uaDf5* does not

863 affect lifespan in both wildtype background and in PCD mutant backgrounds. (C) Lifespan analysis

864 shows that *uaDf5* does not affect lifespan in a wildtype nuclear background nor in PCD mutant

865 backgrounds. For **B and C**, day 1 is defined as the day starved L1s are plated on food. For **A and**  
866 **C**, box plots show median and IQR, and the diamond indicates the mean. Statistical analysis was  
867 performed using the Mann-Whitney Wilcoxon test. (\*\* $p < 0.001$ , \* $p < 0.01$ ,  $p < 0.05$ , .  $p <$   
868  $0.1$ , n.s. not significant).

869

870

871 **Fig. 3 – figure supplement 1**

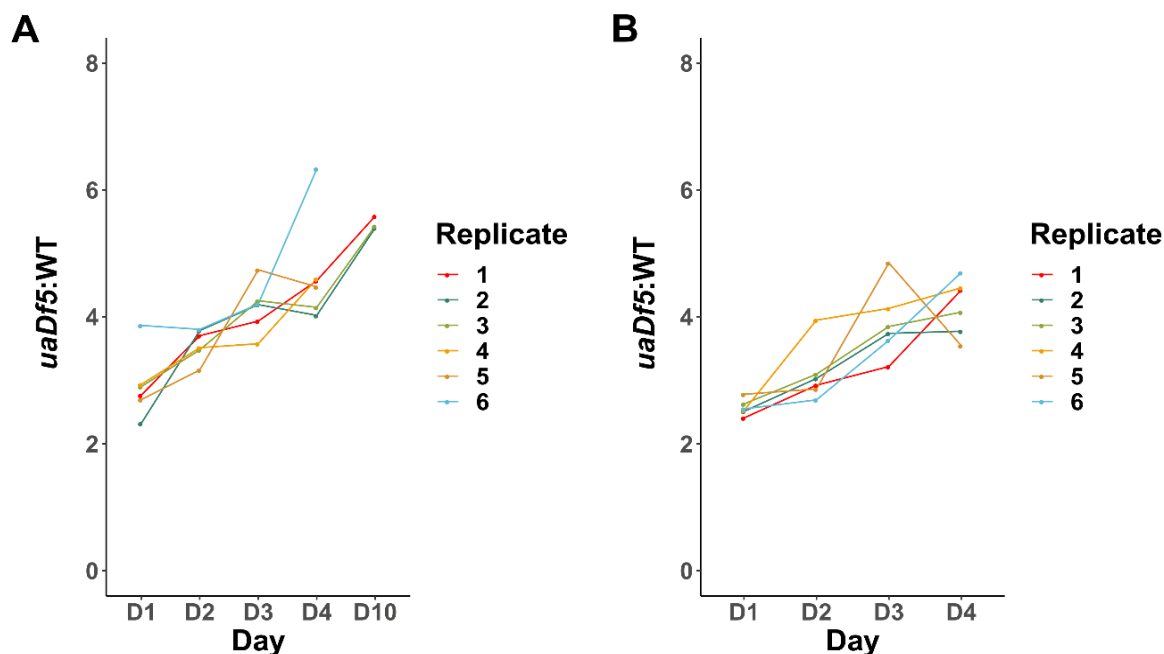

872

873 **Fig. 3 – figure supplement 1: *uaDf5* accumulation in individual lines of adults and progeny. (A)**

874 Analysis of *uaDf5* accumulation in individual lines of aging P0 adults shows a consistent

875 accumulation trend as adults age. **(B)** Analysis of *uaDf5* accumulation in individual lines of F1-L1

876 progeny that were born from those mothers shown in panel A show a consistent trend of progeny

877 born from older mothers inheriting a larger *uaDf5* load than their siblings born from younger

878 mothers.

879

880 **Fig. 4 – figure supplement 1**

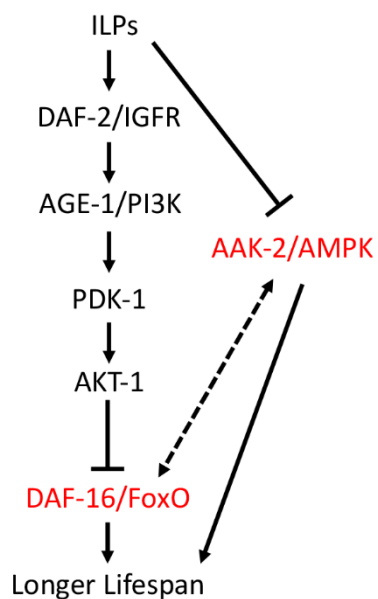

881

882 **Fig. 4 – figure supplement 1: IIS Signaling pathway.** Insulin-like peptides (ILPs) bind to DAF-2 and

883 activate the PI3P pathway which prevents nuclear translocation of DAF-16. AAK-2 may

884 phosphorylate and activate DAF-16 transcriptional activity. Loss of *aak-2* or *daf-2* (highlighted in

885 red) reduces lifespan

886

887 **Fig. 4 – figure supplement 2**

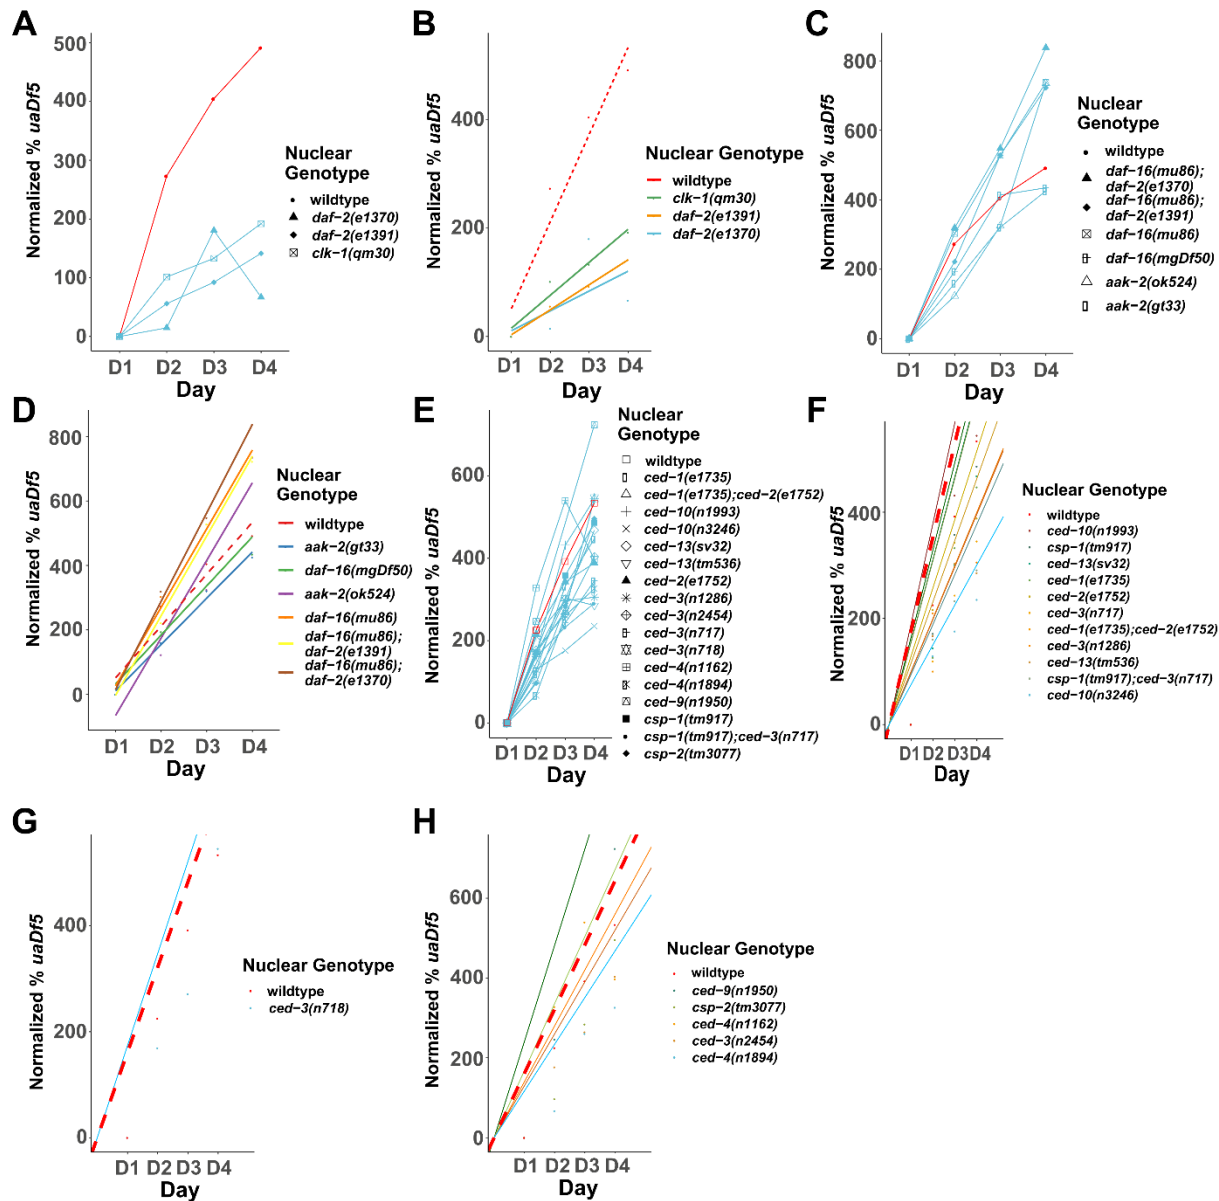

888

889 **Fig. 4 – figure supplement 2: Analysis of the accumulation of mtDNA<sup>*uadF5*</sup> in PCD and lifespan**

890 **mutants.** Analysis of the normalized fractional abundance *uadF5* [(% *uadF5* day x- % *uadF5* day

891 1)\* % *uadF5* day 1] in steady-state populations, showing the accumulation rate of mtDNA<sup>*uadF5*</sup> as

892 worms age from day 1 to day 4 of adulthood. **(A)** Analysis of the accumulation of *uadF5* in long-

893 lived mutants. **(B)** Analysis of the accumulation of mtDNA<sup>*uadF5*</sup> in short-lived mutants. **(C-D)**



894 Linear regression analysis of the normalized fractional abundance  $uaDf5$   $[(\% uaDf5 \text{ day } x - \%$   
895  $uaDf5 \text{ day } 1) * \% uaDf5 \text{ day } 1]$  in steady-state populations, showing the accumulation rate of  
896 mtDNA<sup>*uaDf5*</sup> as worms age from day 1 to day 4 of adulthood. **(C)** Analysis of long-lived mutants.  
897 **(D)** Analysis of short-lived mutants. **(E)** Analysis of the accumulation of mtDNA<sup>*uaDf5*</sup> in PCD  
898 mutants. **(F-H)** Linear regression analysis of the normalized fractional abundance mtDNA<sup>*uaDf5*</sup>  
899  $[(\% uaDf5 \text{ day } x - \% uaDf5 \text{ day } 1) * \% uaDf5 \text{ day } 1]$  in steady-state populations, showing the  
900 accumulation rate of mtDNA<sup>*uaDf5*</sup> as worms age from day 1 to day 4 of adulthood. **(F)** Analysis of  
901 PCD mutants with significantly high steady-state level of mtDNA<sup>*uaDf5*</sup>. **(G)** Analysis of PCD  
902 mutants with significantly low steady-state level of mtDNA<sup>*uaDf5*</sup>. **(H)** Analysis of PCD mutants  
903 with no significant change in the steady-state level of mtDNA<sup>*uaDf5*</sup>. For **C, D, F, G, and H** dots  
904 represent actual datapoints, lines are fitted regression models of the data. For all, n=3  
905 replicates or more of 200 worm populations for each datapoint.  
906  
907

908 Fig. 4 – figure supplement 3

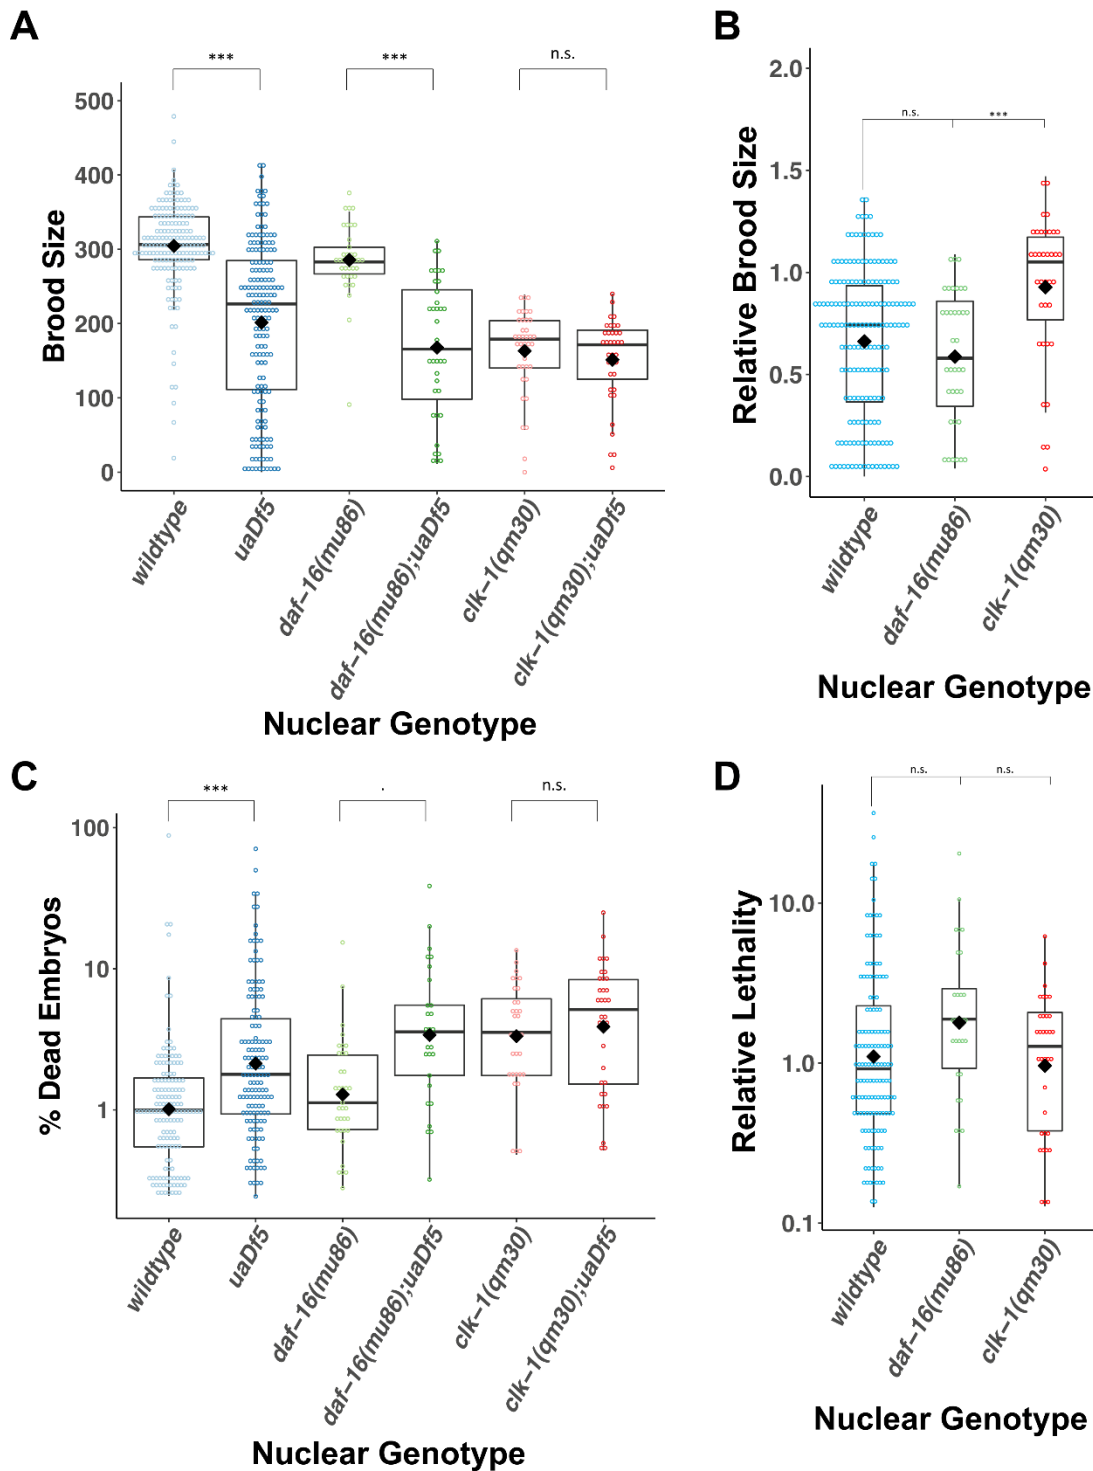

909

910 Fig. 4 – figure supplement 3: *uaDf5* differentially impacts fitness parameters in lifespan-

911 affecting mutants. (A-B) Brood size analysis showing how *uaDf5* differentially impacts brood size

912 in lifespan mutant backgrounds. *uaDf5* has no negative impact on the long-lived mutant *clk-1* but  
913 has a modestly larger negative impact on the short-lived mutant *daf-16* than it does in the  
914 wildtype background. **(B)** Relative brood size of the animals with and without *uaDf5* in the  
915 indicated mutant backgrounds. **(C-D)** Embryonic lethality analysis showing how *uaDf5*  
916 differentially impacts embryonic lethality in lifespan mutant backgrounds. *uaDf5* has no negative  
917 impact on the long-lived mutant *clk-1* but has a modestly larger negative impact on the short-  
918 lived mutant *daf-16* than it does in a wildtype background. **(D)** Relative lethality of the animals  
919 with and without *uaDf5* in the indicated mutant backgrounds. Box plots show median and IQR,  
920 and the diamond indicates the mean. For **A and C**, statistical analysis was performed using the  
921 Mann-Whitney test. For **B and D**, statistical analysis was performed using the Kruskal-Wallis test.  
922 (\*\*\*  $p < 0.001$ , \*\*  $p < 0.01$ , \*  $p < 0.05$ , .  $p < 0.1$ , n.s. not significant).

923

924 **Supplementary Table 1:** A summary of all mutants analyzed in the PCD pathway, including their  
 925 known homologs, whether they are part of the core PCD machinery, if they are pro-apoptotic or  
 926 anti-apoptotic, whether they are mitochondrial proteins, and molecular details of the alleles  
 927 analyzed.

| Gene          | Homolog | Core Machinery | Role in Apoptosis     | Mitochondrial?                   | Allele        | Parental Strain | Molecular Nature of the Allele | Protein Change                                   |
|---------------|---------|----------------|-----------------------|----------------------------------|---------------|-----------------|--------------------------------|--------------------------------------------------|
| <i>ced-1</i>  | SCARF2  | N              | Pro(engulfment)       | N                                | <i>e1735</i>  | CB3203          | Substitution                   | Nonsense Q→Ochre                                 |
| <i>ced-2</i>  | CRK     | N              | Pro(engulfment)       | N                                | <i>e1752</i>  | CB3257          | Substitution                   | Nonsense W→Opal                                  |
| <i>ced-3</i>  | CASPASE | Y              | Pro(executor caspase) | N                                | <i>n717</i>   | MT1522          | Substitution                   | Splice site C→T                                  |
|               |         |                |                       |                                  | <i>n1286</i>  | MT3002          | Substitution                   | Nonsense W→Opal                                  |
|               |         |                |                       |                                  | <i>n718</i>   | MT1743          | Substitution                   | Missense G→R                                     |
|               |         |                |                       |                                  | <i>n2454</i>  | MT8354          | Substitution                   | Missense A→T                                     |
| <i>ced-4</i>  | APAF1   | Y              | Pro(apoptosome)       | Y/N (primarily nuclear membrane) | <i>n1162</i>  | MT2547          | Substitution                   | Nonsense Q→Ochre                                 |
|               |         |                |                       |                                  | <i>n1894</i>  | MT5287          | Not curated                    | Unknown                                          |
| <i>ced-9</i>  | BCL2    | Y              | Anti                  | Y                                | <i>n1950</i>  | MT4770          | Substitution                   | Missense G→E                                     |
| <i>ced-10</i> | RAC     | N              | Pro(engulfment)       | N                                | <i>n1993</i>  | MT5013          | Substitution                   | Missense V→G                                     |
|               |         |                |                       |                                  | <i>n3246</i>  | MT9958          | Substitution                   | Missense G→R                                     |
| <i>ced-13</i> | BH3     | N              | Pro                   | N                                | <i>tm536</i>  | FX536           | 523bp deletion                 | Only first 17bp remain                           |
|               |         |                |                       |                                  | <i>sv32</i>   | MD792           | 1304bp deletion                | Complete knockout, also <i>inx-5</i>             |
| <i>csp-1</i>  | CASPASE | N              | Pro(caspase)          | N                                | <i>tm917</i>  | JR3196          | 751bp deletion                 | Only first 59bp remain                           |
| <i>csp-2</i>  | CASPASE | N              | Anti                  | N                                | <i>tm3077</i> | JR3397          | 319bp deletion                 | Start at position 7317, deletes parts of exon 13 |

|  |  |  |  |  |  |  |  |                  |
|--|--|--|--|--|--|--|--|------------------|
|  |  |  |  |  |  |  |  | and all of<br>14 |
|--|--|--|--|--|--|--|--|------------------|

928

929

930 **Supplementary Table 2:** A summary of all lifespan mutants analyzed, including their known  
 931 homologs, cellular pathways they are known to act in, whether the mutant extends or reduces  
 932 lifespan, and molecular details of the alleles analyzed.

| Gene          | Homologs | Pathway                                                                                                                                      | Allele        | Parental Strain | Molecular Nature of the Allele                 | Protein Change                                        | Mutant lifespan | Note |
|---------------|----------|----------------------------------------------------------------------------------------------------------------------------------------------|---------------|-----------------|------------------------------------------------|-------------------------------------------------------|-----------------|------|
| <i>aak-2</i>  | AMPK     | IIS pathway, adult lifespan, peptidyl-serine phosphorylation, regulation of protein localization                                             | <i>gt33</i>   | TG38            | 606bp deletion                                 | Starts at position 3979, deletes exon 3               | Decrease        | -    |
|               |          |                                                                                                                                              | <i>ok524</i>  | RB754           | 408bp deletion                                 | Starts at position 4136, deletes part of exon 3       | Decrease        | -    |
| <i>clk-1</i>  | COQ7     | Adult behavior, regulation of cellular metabolism                                                                                            | <i>qm30</i>   | MQ130           | 590bp deletion                                 | Starts at position 1044, deletes part of exon 4 and 5 | Increase        | -    |
| <i>daf-2</i>  | IGFR     | IIS pathway, cellular response to salt, negative regulator of macromolecule metabolic processes, positive regulation of developmental growth | <i>e1391</i>  | DR1574          | Substitution                                   | Missense P→L                                          | Increase        | ts   |
|               |          |                                                                                                                                              | <i>e1370</i>  | CB1370          | Substitution                                   | Missense P→S                                          | Increase        | ts   |
|               |          |                                                                                                                                              | <i>m41</i>    | DR1564          | Substitution                                   | Missense G→E                                          | Increase        | ts   |
| <i>daf-16</i> | FOXO     | IIS pathway, defense response to bacterium, regulation of cellular biosynthetic process, regulation of post-                                 | <i>mu86</i>   | CF1038          | 1098bp deletion                                | Deletes 5 exons                                       | Decrease        | -    |
|               |          |                                                                                                                                              | <i>mgDf50</i> | GR1307          | 20193bp deletion with TCTTCATTTT CAG insertion | Deletes 7 exons                                       | Decrease        | -    |

|              |       |                                                                                                                                   |            |       |              |              |          |                                                   |
|--------------|-------|-----------------------------------------------------------------------------------------------------------------------------------|------------|-------|--------------|--------------|----------|---------------------------------------------------|
|              |       | embryonic development                                                                                                             |            |       |              |              |          |                                                   |
| <i>fem-3</i> | novel | Male somatic sex determination, masculinization of hermaphrodite germline, positive regulation of macromolecule metabolic process | <i>q20</i> | JK816 | Not curated  | Unknown      | Increase | Gof and ts; female germline development inhibited |
| <i>glp-4</i> | VARs  | Cell fate specification, embryonic pattern specification, positive regulation of cell proliferation                               | <i>bn2</i> | SS104 | Substitution | Missense G→D | Increase | ts; germline development inhibited                |

933  
934

935 **Supplementary Table 3: *C. elegans* strains used in this study.**

| Strain | Genotype                                                                      | Source     |
|--------|-------------------------------------------------------------------------------|------------|
| N2     | wildtype                                                                      | CGC        |
| LB138  | <i>him-8(e1489) IV; uaDf5/+</i>                                               | CGC        |
| JR3630 | <i>N2; uaDf5/+ (8x backcross version of LB138, him(e1489) was outcrossed)</i> | This study |
| JR3688 | <i>pink-1(tm1779); uaDf5/+</i>                                                | This study |
| JR3880 | <i>ced-3(n717) IV; uaDf5/+</i>                                                | This study |
| JR4330 | <i>csp-1(tm917) II; uaDf5/+</i>                                               | This study |
| JR3977 | <i>ced-3(n1286) IV; uaDf5/+</i>                                               | This study |
| JR3955 | <i>ced-13(sv32) X; uaDf5/+</i>                                                | This study |
| JR3976 | <i>ced-13(tm536) X; uaDf5/+</i>                                               | This study |
| JR3926 | <i>ced-10(n1993) IV; uaDf5/+</i>                                              | This study |
| JR4001 | <i>ced-10(n3246) IV; uaDf5/+</i>                                              | This study |
| JR3972 | <i>ced-1(e1735) I; uaDf5/+</i>                                                | This study |
| JR3978 | <i>ced-2(e1752) IV; uaDf5/+</i>                                               | This study |
| JR4010 | <i>ced-1(e1735)I; ced-2(e1752)IV; uaDf5/+</i>                                 | This study |
| JR3938 | <i>ced-3(n2454) IV; uaDf5/+</i>                                               | This study |
| JR3925 | <i>ced-4(n1162) III; uaDf5/+</i>                                              | This study |
| JR4017 | <i>ced-4(n1894) III; uaDf5/+</i>                                              | This study |
| JR3986 | <i>csp-2(tm3077) IV; uaDf5/+</i>                                              | This study |
| JR4027 | <i>ced-9(n1950) III; uaDf5/+</i>                                              | This study |
| JR3983 | <i>ced-3(n718) IV; uaDf5/+</i>                                                | This study |
| MT1522 | <i>ced-3(n717) IV</i>                                                         | CGC        |
| FX536  | <i>ced-13(tm536) X</i>                                                        | CGC        |
| JR3966 | <i>glp-4(bn2) I; uaDf5/+</i>                                                  | This study |
| JR3949 | <i>fem-3(q20) IV; uaDf5/+</i>                                                 | This study |
| JR3937 | <i>atfs-1(et15) V; uaDf5/+</i>                                                | This study |
| JR3960 | <i>daf-2(e1370) III; uaDf5/+</i>                                              | This study |
| JR3963 | <i>daf-2(e1391) III; uaDf5/+</i>                                              | This study |
| JR3993 | <i>clk-1(qm30) III; uaDf5/+</i>                                               | This study |
| JR4060 | <i>daf-2(e1391) clk-1(qm30) III; uaDf5/+</i>                                  | This study |
| JR3995 | <i>daf-16(mu86) I; uaDf5/+</i>                                                | This study |
| JR3997 | <i>daf-16(mgDf50) I; uaDf5/+</i>                                              | This study |
| JR4011 | <i>aak-2(ok524) X; uaDf5/+</i>                                                | This study |
| JR4012 | <i>aak-2(gt33) X; uaDf5/+</i>                                                 | This study |
| JR4008 | <i>daf-16(mu86) I; daf-2(e1391) III; uaDf5/+</i>                              | This study |
| JR4005 | <i>daf-16(mu86) I; daf-2(e1370) III; uaDf5/+</i>                              | This study |
| JR3941 | <i>glp-1(q231) III; uaDf5/+</i>                                               | This study |
| CF1038 | <i>daf-16(mu86) I</i>                                                         | CGC        |
| MQ130  | <i>clk-1(qm30) III</i>                                                        | CGC        |



|        |                                                 |            |
|--------|-------------------------------------------------|------------|
| JR3981 | <i>csp-1(tm917) II; ced-3(n717) IV; uaDf5/+</i> | This study |
|--------|-------------------------------------------------|------------|

936

937

938 **Acknowledgments**

939 We would like to thank the members of the Rothman lab for their support. We thank Jen Smith  
940 and the BNL at UCSB for providing excellent facilities which were necessary for this work. We  
941 thank Kyle Ploense for his help in statistical analysis. Worm strains used in this work were  
942 provided by the Mitani lab, as well as the Caenorhabditis Genetics Center (CGC), which is funded  
943 by NIH Office of Research Infrastructure Programs Grant P40 OD010440.

944 **Competing Interests**

945 The authors declare no competing or financial interests.

946 **Author contributions**

947 Sagen E. Flowers - conceptualization, investigation, funding acquisition, writing – original draft  
948 preparation, writing – review and editing

949 Rushali Kothari – investigation, writing – review and editing

950 Yamila N. Torres Cleuren - investigation, writing – review and editing

951 Melissa R. Alcorn – statistics, writing – review and editing

952 Chee Kiang Ewe - writing – review and editing

953 Geneva Alok - writing – review and editing

954 Pradeep M. Joshi – conceptualization, investigation, writing – review and editing

955 Joel H. Rothman - conceptualization, supervision, funding acquisition, writing – review and  
956 editing

957 **Funding**

958 This work was supported by the grants from the National Institutes of Health (#R01HD082347,  
959 #R01HD081266, #R01GM143771, and #R21AG068915).

960 **Data Availability**

961 All data generated or analyzed during this study are included in this article and accompanied  
962 supplementary materials. The raw reads of the sequenced N2, LB138, and JR3688 genomes  
963 have been deposited at the NCBI SRA under the study accession number PRJNA836592.

964 **References**

- 965 1. YS N, DM T. Mitochondrial disease: genetics and management. *J Neurol. J Neurol*;  
966 2016;263: 179–191. doi:10.1007/S00415-015-7884-3
- 967 2. PF C. Mitochondrial disease in adults: what’s old and what’s new? *EMBO Mol Med*.  
968 *EMBO Mol Med*; 2015;7: 1503–1512. doi:10.15252/EMMM.201505079
- 969 3. Gorman GS, Schaefer AM, Ng Y, Gomez N, Blakely EL, Alston CL, et al. Prevalence of  
970 nuclear and mitochondrial DNA mutations related to adult mitochondrial disease. *Ann*  
971 *Neurol. John Wiley & Sons, Ltd*; 2015;77: 753–759. doi:10.1002/ANA.24362
- 972 4. Ghaoui R, Sue CM. Movement disorders in mitochondrial disease. *J Neurol. Dr. Dietrich*  
973 *Steinkopff Verlag GmbH and Co. KG*; 2018;265: 1230–1240. doi:10.1007/s00415-017-  
974 8722-6
- 975 5. Area-Gomez E, Schon EA. Mitochondrial genetics and disease. *Journal of Child Neurology*.  
976 *SAGE Publications Inc.*; 2014. pp. 1208–1215. doi:10.1177/0883073814539561
- 977 6. Dhillon VS, Fenech M. Mutations that affect mitochondrial functions and their  
978 association with neurodegenerative diseases. *Mutation Research - Reviews in Mutation*  
979 *Research*. 2014. pp. 1–13. doi:10.1016/j.mrrev.2013.09.001
- 980 7. Park CB, Larsson NG. Mitochondrial DNA mutations in disease and aging. *Journal of Cell*  
981 *Biology*. 2011. pp. 809–818. doi:10.1083/jcb.201010024

- 982 8. Burté F, Carelli V, Chinnery PF, Yu-Wai-Man P. Disturbed mitochondrial dynamics and  
983 neurodegenerative disorders. *Nature Reviews Neurology*. Nature Publishing Group;  
984 2015. pp. 11–24. doi:10.1038/nrneurol.2014.228
- 985 9. Schon EA, Dimauro S, Hirano M. Human mitochondrial DNA: Roles of inherited and  
986 somatic mutations. *Nature Reviews Genetics*. 2012. pp. 878–890. doi:10.1038/nrg3275
- 987 10. Brown WM, George M, Wilson AC. Rapid evolution of animal mitochondrial DNA. *Proc*  
988 *Natl Acad Sci U S A*. 1979;76: 1967–1971. doi:10.1073/pnas.76.4.1967
- 989 11. Konrad A, Thompson O, Waterston RH, Moerman DG, Keightley PD, Bergthorsson U, et  
990 al. Mitochondrial mutation rate, spectrum and heteroplasmy in *Caenorhabditis elegans*  
991 spontaneous mutation accumulation lines of differing population size. *Mol Biol Evol*.  
992 Oxford University Press; 2017;34: 1319–1334. doi:10.1093/molbev/msx051
- 993 12. Denver DR, Morris K, Lynch M, Vassilieva LL, Thomas WK. High direct estimate of the  
994 mutation rate in the mitochondrial genome of *Caenorhabditis elegans*. *Science* (80- ).  
995 2000;289: 2342–2344. doi:10.1126/science.289.5488.2342
- 996 13. Palozzi JM, Jeedigunta SP, Hurd TR. Mitochondrial DNA Purifying Selection in Mammals  
997 and Invertebrates. *Journal of Molecular Biology*. Academic Press; 2018. pp. 4834–4848.  
998 doi:10.1016/j.jmb.2018.10.019
- 999 14. Stewart JB, Freyer C, Elson JL, Larsson NG. Purifying selection of mtDNA and its  
1000 implications for understanding evolution and mitochondrial disease. *Nature Reviews*  
1001 *Genetics*. 2008. pp. 657–662. doi:10.1038/nrg2396
- 1002 15. Twig G, Shirihai OS. The interplay between mitochondrial dynamics and mitophagy.  
1003 *Antioxidants and Redox Signaling*. 2011. pp. 1939–1951. doi:10.1089/ars.2010.3779

- 1004 16. Busch KB, Kowald A, Spelbrink JN. Quality matters: How does mitochondrial network  
1005 dynamics and quality control impact on mtDNA integrity? *Philosophical Transactions of*  
1006 *the Royal Society B: Biological Sciences*. Royal Society of London; 2014.  
1007 doi:10.1098/rstb.2013.0442
- 1008 17. Ni HM, Williams JA, Ding WX. Mitochondrial dynamics and mitochondrial quality control.  
1009 *Redox Biology*. Elsevier B.V.; 2015. pp. 6–13. doi:10.1016/j.redox.2014.11.006
- 1010 18. Ashrafi G, Schwarz TL. The pathways of mitophagy for quality control and clearance of  
1011 mitochondria. *Cell Death and Differentiation*. 2013. pp. 31–42. doi:10.1038/cdd.2012.81
- 1012 19. Youle RJ, Narendra DP. Mechanisms of mitophagy. *Nat Rev Mol Cell Biol*. 2011;12: 9–14.  
1013 doi:10.1038/nrm3028
- 1014 20. Tilokani L, Nagashima S, Paupe V, Prudent J. Mitochondrial dynamics: Overview of  
1015 molecular mechanisms. *Essays in Biochemistry*. Portland Press Ltd; 2018. pp. 341–360.  
1016 doi:10.1042/EBC20170104
- 1017 21. Hernando-Rodríguez B, Artal-Sanz M. Mitochondrial Quality Control Mechanisms and the  
1018 PHB (Prohibitin) Complex. *Cells*. MDPI AG; 2018;7: 238. doi:10.3390/cells7120238
- 1019 22. Stéphane Rolland AG, Schneid S, Schwarz M, Mokranjac D, Lambie E, Conradt B.  
1020 Compromised Mitochondrial Protein Import Acts as a Signal for UPR mt. *Cell Rep*.  
1021 2019;28: 1659–1669. doi:10.1016/j.celrep.2019.07.049
- 1022 23. Münch C. The different axes of the mammalian mitochondrial unfolded protein response.  
1023 *BMC Biology*. BioMed Central Ltd.; 2018. doi:10.1186/s12915-018-0548-x
- 1024 24. Callegari S, Dennerlein S. Sensing the stress: A role for the UPR mt and UPR am in the  
1025 quality control of mitochondria. *Frontiers in Cell and Developmental Biology*. Frontiers

- 1026 Media S.A.; 2018. doi:10.3389/fcell.2018.00031
- 1027 25. Gitschlag BL, Kirby CS, Samuels DC, Gangula RD, Mallal SA, Patel MR. Homeostatic  
1028 Responses Regulate Selfish Mitochondrial Genome Dynamics in *C. elegans*. *Cell Metab.*  
1029 *Cell Press*; 2016;24: 91–103. doi:10.1016/j.cmet.2016.06.008
- 1030 26. Nargund AM, Pellegrino MW, Fiorese CJ, Baker BM, Haynes CM. Mitochondrial import  
1031 efficiency of ATFS-1 regulates mitochondrial UPR activation. *Science (80- )*. American  
1032 Association for the Advancement of Science; 2012;337: 587–590.  
1033 doi:10.1126/science.1223560
- 1034 27. Lin YF, Schulz AM, Pellegrino MW, Lu Y, Shaham S, Haynes CM. Maintenance and  
1035 propagation of a deleterious mitochondrial genome by the mitochondrial unfolded  
1036 protein response. *Nature*. Nature Publishing Group; 2016;533: 416–419.  
1037 doi:10.1038/nature17989
- 1038 28. Murphy CT, Hu PJ. Insulin/insulin-like growth factor signaling in *C. elegans* [Internet].  
1039 *WormBook : the online review of C. elegans biology*. 2013. pp. 1–43.  
1040 doi:10.1895/wormbook.1.164.1
- 1041 29. Haroon S, Li A, Weinert JL, Fritsch C, Ericson NG, Alexander-Floyd J, et al. Multiple  
1042 Molecular Mechanisms Rescue mtDNA Disease in *C. elegans*. *Cell Rep*. Elsevier B.V.;  
1043 2018;22: 3115–3125. doi:10.1016/j.celrep.2018.02.099
- 1044 30. Lord CEN, Gunawardena AHLAN. Programmed cell death in *C. elegans*, mammals and  
1045 plants. *European Journal of Cell Biology*. 2012. pp. 603–613.  
1046 doi:10.1016/j.ejcb.2012.02.002
- 1047 31. Jeong SY, Seol DW. The role of mitochondria in apoptosis. *Journal of Biochemistry and*

- 1048 Molecular Biology. 2008. pp. 11–22. doi:10.5483/bmbrep.2008.41.1.011
- 1049 32. Estaquier J, Vallette F, Vayssiere JL, Mignotte B. The mitochondrial pathways of  
1050 apoptosis. *Adv Exp Med Biol.* 2012;942: 157–183. doi:10.1007/978-94-007-2869-1\_7
- 1051 33. Bhola PD, Letai A. Mitochondria-Judges and Executioners of Cell Death Sentences.  
1052 *Molecular Cell.* Cell Press; 2016. pp. 695–704. doi:10.1016/j.molcel.2016.02.019
- 1053 34. Tower J. Programmed cell death in aging. *Ageing Research Reviews.* Elsevier Ireland Ltd;  
1054 2015. pp. 90–100. doi:10.1016/j.arr.2015.04.002
- 1055 35. Larsson N-G. Somatic Mitochondrial DNA Mutations in Mammalian Aging. *Annu Rev*  
1056 *Biochem. Annual Reviews;* 2010;79: 683–706. doi:10.1146/annurev-biochem-060408-  
1057 093701
- 1058 36. Payne BAI, Chinnery PF. Mitochondrial dysfunction in aging: Much progress but many  
1059 unresolved questions. *Biochim Biophys Acta.* 2015;1847: 1347–53.  
1060 doi:10.1016/j.bbabbio.2015.05.022
- 1061 37. Kauppila TES, Kauppila JHK, Larsson NG. Mammalian Mitochondria and Aging: An  
1062 Update. *Cell Metabolism.* Cell Press; 2017. pp. 57–71. doi:10.1016/j.cmet.2016.09.017
- 1063 38. Conradt B, Wu YC, Xue D. Programmed cell death during *Caenorhabditis elegans*  
1064 development. *Genetics.* *Genetics;* 2016;203: 1533–1562.  
1065 doi:10.1534/genetics.115.186247
- 1066 39. Gumienny TL, Lambie E, Hartweg E, Horvitz HR, Hengartner MO. Genetic control of  
1067 programmed cell death in the *Caenorhabditis elegans* hermaphrodite germline.  
1068 *Development.* 1999;126: 1011–1022. doi:10.5167/uzh-1041
- 1069 40. Baum JS, St. George JP, McCall K. Programmed cell death in the germline. *Seminars in*

- 1070 Cell and Developmental Biology. Elsevier Ltd; 2005. pp. 245–259.
- 1071 doi:10.1016/j.semcdb.2004.12.008
- 1072 41. Jaramillo-Lambert A, Ellefson M, Villeneuve AM, Engebrecht JA. Differential timing of S  
1073 phases, X chromosome replication, and meiotic prophase in the *C. elegans* germ line. *Dev*  
1074 *Biol.* Academic Press Inc.; 2007;308: 206–221. doi:10.1016/j.ydbio.2007.05.019
- 1075 42. Hafner A, Bulyk ML, Jambhekar A, Lahav G. The multiple mechanisms that regulate p53  
1076 activity and cell fate. *Nature Reviews Molecular Cell Biology.* Nature Publishing Group;  
1077 2019. pp. 199–210. doi:10.1038/s41580-019-0110-x
- 1078 43. Derry WB, Putzke AP, Rothman JH. *Caenorhabditis elegans* p53: Role in apoptosis,  
1079 meiosis, and stress resistance. *Science* (80- ). 2001;294: 591–595.  
1080 doi:10.1126/science.1065486
- 1081 44. Huang W, Jiang T, Choi W, Qi S, Pang Y, Hu Q, et al. Mechanistic insights into CED-4-  
1082 mediated activation of CED-3. *Genes Dev.* *Genes Dev*; 2013;27: 2039–2048.  
1083 doi:10.1101/GAD.224428.113
- 1084 45. Seshagiri S, Miller LK. *Caenorhabditis elegans* CED-4 stimulates CED-3 processing and  
1085 CED-3-induced. *Curr Biol.* Cell Press; 1997;7: 455–460. doi:10.1016/S0960-  
1086 9822(06)00216-8
- 1087 46. Tsang WY, Lemire BD. Stable heteroplasmy but differential inheritance of a large  
1088 mitochondrial DNA deletion in nematodes. *Biochem Cell Biol.* 2002;80: 645–654.  
1089 doi:10.1139/o02-135
- 1090 47. Lemire B. Mitochondrial genetics. *WormBook.* 2005; doi:10.1895/wormbook.1.25.1
- 1091 48. Van Der Blik AM, Sedensky MM, Morgan PG. Cell biology of the mitochondrion.



- 1092 Genetics. Genetics Society of America; 2017;207: 843–871.
- 1093 doi:10.1534/genetics.117.300262
- 1094 49. Sousa JS, D’Imprima E, Vonck J. Mitochondrial respiratory chain complexes. Subcellular  
1095 Biochemistry. Springer New York; 2018. pp. 167–227. doi:10.1007/978-981-10-7757-9\_7
- 1096 50. Baradaran R, Berrisford JM, Minhas GS, Sazanov LA. Crystal structure of the entire  
1097 respiratory complex i. Nature. Nature; 2013;494: 443–448. doi:10.1038/nature11871
- 1098 51. Song Z, Laleve A, Vallières C, McGeehan JE, Lloyd RE, Meunier B. Human Mitochondrial  
1099 Cytochrome b Variants Studied in Yeast: Not All Are Silent Polymorphisms. Hum Mutat.  
1100 John Wiley and Sons Inc.; 2016;37: 933–941. doi:10.1002/humu.23024
- 1101 52. Gartner A, Boag PR, Blackwell TK. Germline survival and apoptosis. WormBook : the  
1102 online review of C. elegans biology. 2008. pp. 1–20. doi:10.1895/wormbook.1.145.1
- 1103 53. Cohen GM. Caspases: The executioners of apoptosis. Biochemical Journal. Portland Press  
1104 Ltd; 1997. pp. 1–16. doi:10.1042/bj3260001
- 1105 54. Shaham S, Reddien PW, Davies B, Horvitz HR. Mutational Analysis of the Caenorhabditis  
1106 elegans Cell-Death Gene ced-3. Genetics. 1999;153.
- 1107 55. Jeong PY, Kumar A, Joshi PM, Rothman JH. Intertwined Functions of Separase and  
1108 Caspase in Cell Division and Programmed Cell Death. Sci Rep. Nature Research; 2020;10.  
1109 doi:10.1038/s41598-020-63081-w
- 1110 56. Denning DP, Hatch V, Horvitz HR. Both the Caspase CSP-1 and a Caspase-Independent  
1111 Pathway Promote Programmed Cell Death in Parallel to the Canonical Pathway for  
1112 Apoptosis in Caenorhabditis elegans. PLoS Genet. 2013;9.  
1113 doi:10.1371/journal.pgen.1003341

- 1114 57. Shaham S. Identification of multiple *Caenorhabditis elegans* caspases and their potential  
1115 roles in proteolytic cascades. *J Biol Chem.* 1998;273: 35109–35117.  
1116 doi:10.1074/jbc.273.52.35109
- 1117 58. King SD, Gray CF, Song L, Nechushtai R, Gumienny TL, Mittler R, et al. The *cisd* gene  
1118 family regulates physiological germline apoptosis through *ced-13* and the canonical cell  
1119 death pathway in *Caenorhabditis elegans*. *Cell Death Differ.* Nature Publishing Group;  
1120 2019;26: 162–178. doi:10.1038/s41418-018-0108-5
- 1121 59. Schumacher B, Schertel C, Wittenburg N, Tuck S, Mitani S, Gartner A, et al. *C. elegans*  
1122 *ced-13* can promote apoptosis and is induced in response to DNA damage. *Cell Death*  
1123 *Differ.* Nature Publishing Group; 2005;12: 153–161. doi:10.1038/sj.cdd.4401539
- 1124 60. Fairlie WD, Perugini MA, Kvensakul M, Chen L, Huang DCS, Colman PM. CED-4 forms a 2 :  
1125 2 heterotetrameric complex with CED-9 until specifically displaced by EGL-1 or CED-13.  
1126 *Cell Death Differ.* 2006;13: 426–434. doi:10.1038/sj.cdd.4401762
- 1127 61. Conradt B, Xue D. Programmed cell death. *WormBook* : the online review of *C. elegans*  
1128 biology. 2005. pp. 1–13. doi:10.1895/wormbook.1.32.1
- 1129 62. Wu D, Chai Y, Zhu Z, Li W, Ou G, Li W. CED-10-WASP-Arp2/3 signaling axis regulates  
1130 apoptotic cell corpse engulfment in *C. elegans*. *Dev Biol.* Academic Press Inc.; 2017;428:  
1131 215–223. doi:10.1016/j.ydbio.2017.06.005
- 1132 63. Kinchen JM, Cabello J, Kilngele D, Wong K, Felchtinger R, Schnabel H, et al. Two pathways  
1133 converge at CED-10 to mediate actin rearrangement and corpse removal in *C. elegans*.  
1134 *Nature.* 2005;434: 93–99. doi:10.1038/nature03263
- 1135 64. Hochreiter-Hufford A, Ravichandran KS. Clearing the dead: Apoptotic cell sensing,

- 1136 recognition, engulfment, and digestion. *Cold Spring Harb Perspect Biol.* 2013;5.  
1137 doi:10.1101/cshperspect.a008748
- 1138 65. Wang X, Yang C. Programmed cell death and clearance of cell corpses in *Caenorhabditis*  
1139 *elegans*. *Cellular and Molecular Life Sciences.* Birkhauser Verlag AG; 2016. pp. 2221–  
1140 2236. doi:10.1007/s00018-016-2196-z
- 1141 66. Reddien PW, Horvitz HR. THE ENGULFMENT PROCESS OF PROGRAMMED CELL DEATH IN  
1142 *CAENORHABDITIS ELEGANS*. *Annu Rev Cell Dev Biol.* Annual Reviews; 2004;20: 193–221.  
1143 doi:10.1146/annurev.cellbio.20.022003.114619
- 1144 67. Hoepfner DJ, Hengartner MO, Schnabel R. Engulfment genes cooperate with *ced-3* to  
1145 promote cell death in *Caenorhabditis elegans*. *Nature.* Nature Publishing Group;  
1146 2001;412: 202–206. doi:10.1038/35084103
- 1147 68. Geng X, Zhou QH, Kage-Nakadai E, Shi Y, Yan N, Mitani S, et al. *Caenorhabditis elegans*  
1148 caspase homolog CSP-2 inhibits CED-3 autoactivation and apoptosis in germ cells. *Cell*  
1149 *Death Differ.* 2009;16: 1385–1394. doi:10.1038/cdd.2009.88
- 1150 69. Yang X, Chang HY, Baltimore D. Essential role of CED-4 oligomerization in CED-3  
1151 activation and apoptosis. *Science (80- )*. American Association for the Advancement of  
1152 *Science*; 1998;281: 1355–1357. doi:10.1126/science.281.5381.1355
- 1153 70. Parsons MJ, Green DR. Mitochondria in cell death. *Essays Biochem.* 2010;47: 99–114.  
1154 doi:10.1042/BSE0470099
- 1155 71. Harman D. Free radical theory of aging. *Mutat Res.* 1992;275: 257–266.  
1156 doi:10.1016/0921-8734(92)90030-S
- 1157 72. HARMAN D. Aging: a theory based on free radical and radiation chemistry. *J Gerontol.*

- 1158 1956;11: 298–300. doi:10.1093/geronj/11.3.298
- 1159 73. Szczepanowska K, Trifunovic A. Origins of mtDNA mutations in ageing. Essays in  
1160 Biochemistry. Portland Press Ltd; 2017. pp. 325–337. doi:10.1042/EBC20160090
- 1161 74. Bratic A, Larsson N-G. The role of mitochondria in aging. J Clin Invest. 2013;123: 951–957.  
1162 doi:10.1172/JCI64125
- 1163 75. Ziegler D V., Wiley CD, Velarde MC. Mitochondrial effectors of cellular senescence:  
1164 Beyond the free radical theory of aging. Aging Cell. Blackwell Publishing Ltd; 2015. pp. 1–  
1165 7. doi:10.1111/accel.12287
- 1166 76. Kimble J, Crittenden SL. Germline proliferation and its control. WormBook : the online  
1167 review of C. elegans biology. 2005. pp. 1–14. doi:10.1895/wormbook.1.13.1
- 1168 77. Yoon DS, Alfhili MA, Friend K, Lee MH. MPK-1/ERK regulatory network controls the  
1169 number of sperm by regulating timing of sperm-oocyte switch in C. elegans germline.  
1170 Biochem Biophys Res Commun. Elsevier B.V.; 2017;491: 1077–1082.  
1171 doi:10.1016/j.bbrc.2017.08.014
- 1172 78. Angeles-Albores D, Leighton DHW, Tsou T, Khaw TH, Antoshechkin I, Sternberg PW. The  
1173 Caenorhabditis elegans female-like state: Decoupling the transcriptomic effects of aging  
1174 and sperm status. G3 Genes, Genomes, Genet. Genetics Society of America; 2017;7:  
1175 2969–2977. doi:10.1534/g3.117.300080
- 1176 79. Kujoth CC, Hiona A, Pugh TD, Someya S, Panzer K, Wohlgemuth SE, et al. Medicine:  
1177 Mitochondrial DNA mutations, oxidative stress, and apoptosis in mammalian aging.  
1178 Science (80- ). American Association for the Advancement of Science; 2005;309: 481–  
1179 484. doi:10.1126/science.1112125

- 1180 80. Beanan MJ, Strome S. Characterization of a germ-line proliferation mutation in *C.*  
1181 *elegans*. *Development*. 1992;116.
- 1182 81. Barton MK, Schedl TB, Kimble J. Gain-of-function mutations of *fem-3*, a sex-  
1183 determination gene in *Caenorhabditis elegans*. *Genetics*. 1987;115: 107–119.
- 1184 82. Bartke A. *Insulin and aging*. *Cell Cycle*. Taylor and Francis Inc.; 2008. pp. 3338–3343.  
1185 doi:10.4161/cc.7.21.7012
- 1186 83. Anisimov VN, Bartke A. The key role of growth hormone-insulin-IGF-1 signaling in aging  
1187 and cancer. *Critical Reviews in Oncology/Hematology*. 2013. pp. 201–223.  
1188 doi:10.1016/j.critrevonc.2013.01.005
- 1189 84. Piper MDW, Selman C, McElwee JJ, Partridge L. Separating cause from effect: how does  
1190 insulin/IGF signalling control lifespan in worms, flies and mice? *J Intern Med*. John Wiley  
1191 & Sons, Ltd; 2008;263: 179–191. doi:10.1111/J.1365-2796.2007.01906.X
- 1192 85. Kenyon C, Chang J, Gensch E, Rudner A, Tabtiang R. A *C. elegans* mutant that lives twice  
1193 as long as wild type. *Nature*. 1993;366: 461–464. doi:10.1038/366461a0
- 1194 86. Tatar M, Kopelman A, Epstein D, Tu M-P, Yin C-M, Garofalo RS. A Mutant *Drosophila*  
1195 Insulin Receptor Homolog That Extends Life-Span and Impairs Neuroendocrine Function.  
1196 *Science (80- )*. American Association for the Advancement of Science; 2001;292: 107–  
1197 110. doi:10.1126/SCIENCE.1057987
- 1198 87. Blüher M, Kahn BB, Kahn CR. Extended Longevity in Mice Lacking the Insulin Receptor in  
1199 Adipose Tissue. *Science (80- )*. American Association for the Advancement of Science;  
1200 2003;299: 572–574. doi:10.1126/SCIENCE.1078223
- 1201 88. Gitschlag BL, Tate AT, Patel MR. Nutrient status shapes selfish mitochondrial genome

- 1202 dynamics across different levels of selection. *Elife*. eLife Sciences Publications Ltd;  
1203 2020;9: 1–27. doi:10.7554/ELIFE.56686
- 1204 89. Apfeld J, O’Connor G, McDonagh T, DiStefano PS, Curtis R. The AMP-activated protein  
1205 kinase AAK-2 links energy levels and insulin-like signals to lifespan in *C. elegans*. *Genes*  
1206 *Dev*. Cold Spring Harbor Laboratory Press; 2004;18: 3004–3009.  
1207 doi:10.1101/gad.1255404
- 1208 90. Miyadera H, Kano K, Miyoshi H, Ishii N, Hekimi S, Kita K. Quinones in long-lived *clk-1*  
1209 mutants of *Caenorhabditis elegans*. *FEBS Lett*. No longer published by Elsevier; 2002;512:  
1210 33–37. doi:10.1016/S0014-5793(02)02282-2
- 1211 91. Miyadera H, Amino H, Hiraishi A, Taka H, Murayama K, Miyoshi H, et al. Altered Quinone  
1212 Biosynthesis in the Long-lived *clk-1* Mutants of *Caenorhabditis elegans*. *J Biol Chem*.  
1213 Elsevier; 2001;276: 7713–7716. doi:10.1074/JBC.C000889200
- 1214 92. Kirby CS, Patel MR. Elevated mitochondrial DNA copy number found in ubiquinone-  
1215 deficient *clk-1* mutants is not rescued by ubiquinone precursor 2-4-dihydroxybenzoate.  
1216 *Mitochondrion*. Elsevier B.V.; 2021;58: 38–48. doi:10.1016/j.mito.2021.02.001
- 1217 93. Charmpilas N, Tavernarakis N. Mitochondrial maturation drives germline stem cell  
1218 differentiation in *Caenorhabditis elegans*. *Cell Death Differ*. Springer Nature; 2020;27:  
1219 601–617. doi:10.1038/s41418-019-0375-9
- 1220 94. Folmes CDL, Ma H, Mitalipov S, Terzic A. Mitochondria in pluripotent stem cells:  
1221 Stemness regulators and disease targets. *Current Opinion in Genetics and Development*.  
1222 Elsevier Ltd; 2016. pp. 1–7. doi:10.1016/j.gde.2016.02.001
- 1223 95. Floros VI, Pyle A, Dletmann S, Wei W, Tang WWC, Irie N, et al. Segregation of

- 1224 mitochondrial DNA heteroplasmy through a developmental genetic bottleneck in human  
1225 embryos. *Nat Cell Biol.* 2018; 144–151. doi:10.1038/s41556-017-0017-8
- 1226 96. Zhang H, Burr SP, Chinnery PF. The mitochondrial DNA genetic bottleneck: Inheritance  
1227 and beyond. *Essays in Biochemistry.* Portland Press Ltd; 2018. pp. 225–234.  
1228 doi:10.1042/EBC20170096
- 1229 97. Wai T, Teoli D, Shoubridge EA. The mitochondrial DNA genetic bottleneck results from  
1230 replication of a subpopulation of genomes. *Nat Genet.* 2008; 1484–1488.  
1231 doi:10.1038/ng.258
- 1232 98. Liao WS, Gonzalez-Serricchio AS, Deshommes C, Chin K, LaMunyon CW. A persistent  
1233 mitochondrial deletion reduces fitness and sperm performance in heteroplasmic  
1234 populations of *C. elegans*. *BMC Genet. BioMed Central*; 2007;8: 1–11. doi:10.1186/1471-  
1235 2156-8-8
- 1236 99. Zhu Z, Han X, Wang Y, Liu W, Lu Y, Xu C, et al. Identification of Specific Nuclear Genetic  
1237 Loci and Genes That Interact With the Mitochondrial Genome and Contribute to  
1238 Fecundity in *Caenorhabditis elegans*. *Front Genet. Frontiers*; 2019;10: 28.  
1239 doi:10.3389/fgene.2019.00028
- 1240 100. Levin L, Blumberg A, Barshad G, Mishmar D. Mito-nuclear co-evolution: The positive and  
1241 negative sides of functional ancient mutations. *Front Genet. Frontiers Media S.A.*;  
1242 2014;5: 448. doi:10.3389/fgene.2014.00448
- 1243 101. Paliwal S, Fiumera AC, Fiumera HL. Mitochondrial-nuclear epistasis contributes to  
1244 phenotypic variation and coadaptation in natural isolates of *saccharomyces cerevisiae*.  
1245 *Genetics. Genetics Society of America*; 2014;198: 1251–1265.

- 1246            doi:10.1534/genetics.114.168575
- 1247    102.    Zhu CT, Ingelmo P, Rand DM. G×G×E for Lifespan in *Drosophila*: Mitochondrial, Nuclear,  
1248            and Dietary Interactions that Modify Longevity. *PLoS Genet. Public Library of Science*;  
1249            2014;10. doi:10.1371/journal.pgen.1004354
- 1250    103.    Meiklejohn CD, Holmbeck MA, Siddiq MA, Abt DN, Rand DM, Montooth KL. An  
1251            Incompatibility between a Mitochondrial tRNA and Its Nuclear-Encoded tRNA Synthetase  
1252            Compromises Development and Fitness in *Drosophila*. *PLoS Genet. Public Library of*  
1253            *Science*; 2013;9. doi:10.1371/journal.pgen.1003238
- 1254    104.    Dingley SD, Polyak E, Ostrovsky J, Srinivasan S, Lee I, Rosenfeld AB, et al. Mitochondrial  
1255            DNA Variant in COX1 Subunit Significantly Alters Energy Metabolism of Geographically  
1256            Divergent Wild Isolates in *Caenorhabditis elegans*. *J Mol Biol.* 2014;426: 2199–2216.  
1257            doi:10.1016/j.jmb.2014.02.009
- 1258    105.    Yee C, Yang W, Hekimi S. The intrinsic apoptosis pathway mediates the pro-longevity  
1259            response to mitochondrial ROS in *C. elegans*. *Cell*. PMC Canada manuscript submission;  
1260            2014;157: 897. doi:10.1016/J.CELL.2014.02.055
- 1261    106.    H H, C K. Signals from the reproductive system regulate the lifespan of *C. elegans*.  
1262            *Nature*. *Nature*; 1999;399: 362–366. doi:10.1038/20694
- 1263    107.    L D, CW A, S K. New insights into apoptosome structure and function. *Cell Death Differ.*  
1264            *Cell Death Differ*; 2018;25: 1194–1208. doi:10.1038/S41418-017-0025-Z
- 1265    108.    S Y, X Y, JM A, JE H, SJ L, CW A. The holo-apoptosome: activation of procaspase-9 and  
1266            interactions with caspase-3. *Structure*. *Structure*; 2011;19: 1084–1096.  
1267            doi:10.1016/J.STR.2011.07.001



- 1268 109. Zermati Y, Mouhamad S, Stergiou L, Besse B, Galluzzi L, Boehrer S, et al. Nonapoptotic  
1269 Role for Apaf-1 in the DNA Damage Checkpoint. *Mol Cell. Cell Press*; 2007;28: 624–637.  
1270 doi:10.1016/j.molcel.2007.09.030
- 1271 110. Ferraro E, Pesaresi MG, De Zio D, Cencioni MT, Gortat A, Cozzolino M, et al. Apaf1 plays a  
1272 pro-survival role by regulating centrosome morphology and function. *J Cell Sci.* 2011;124:  
1273 3450–3463. doi:10.1242/jcs.086298
- 1274 111. Liu WH, Lin YL, Wang JP, Liou W, Hou RF, Wu YC, et al. Restriction of vaccinia virus  
1275 replication by a ced-3 and ced-4-dependent pathway in *Caenorhabditis elegans*. *Proc*  
1276 *Natl Acad Sci U S A. National Academy of Sciences*; 2006;103: 4174–4179.  
1277 doi:10.1073/pnas.0506442103
- 1278 112. Wang G, Sun L, Reina CP, Song I, Gabel C V., Driscoll M. CED-4 CARD domain residues can  
1279 modulate non-apoptotic neuronal regeneration functions independently from apoptosis.  
1280 *Sci Rep.* 2019;9: 13315. doi:10.1038/s41598-019-49633-9
- 1281 113. Chaudhary D, O'Rourke K, Chinnaiyan AM, Dixit VM. The Death Inhibitory Molecules CED-  
1282 9 and CED-4L Use a Common Mechanism to Inhibit the CED-3 Death Protease. *J Biol*  
1283 *Chem. Elsevier*; 1998;273: 17708–17712. doi:10.1074/JBC.273.28.17708
- 1284 114. Mack HID, Zhang P, Fonslow BR, Yates JR. The protein kinase MBK-1 contributes to  
1285 lifespan extension in daf-2 mutant and germline-deficient *Caenorhabditis elegans*. *Aging*  
1286 (Albany NY). *Impact Journals LLC*; 2017;9: 1414–1432. doi:10.18632/aging.101244
- 1287 115. Libina N, Berman JR, Kenyon C. Tissue-Specific Activities of *C. elegans* DAF-16 in the  
1288 Regulation of Lifespan. *Cell. Cell Press*; 2003;115: 489–502. doi:10.1016/S0092-  
1289 8674(03)00889-4

- 1290 116. Lapierre LR, Hansen M. Lessons from *C. elegans*: signaling pathways for longevity. Trends  
1291 Endocrinol Metab. Elsevier Current Trends; 2012;23: 637–644.  
1292 doi:10.1016/J.TEM.2012.07.007
- 1293 117. A A. Regulation of longevity by the reproductive system. Exp Gerontol. Exp Gerontol;  
1294 2013;48: 596–602. doi:10.1016/J.EXGER.2012.09.009
- 1295 118. Branicky R, Bénard C, Hekimi S. *clk-1*, mitochondria, and physiological rates. BioEssays.  
1296 2000. pp. 48–56. doi:10.1002/(SICI)1521-1878(200001)22:1<48::AID-BIES9>3.0.CO;2-F
- 1297 119. Hekimi S, Guarente L. Genetics and the specificity of the aging process. Science. 2003. pp.  
1298 1351–1354. doi:10.1126/science.1082358
- 1299 120. Blackwell TK, Steinbaugh MJ, Hourihan JM, Ewald CY, Isik M. *SKN-1/Nrf*, stress responses,  
1300 and aging in *Caenorhabditis elegans*. Free Radic Biol Med. Pergamon; 2015;88: 290–301.  
1301 doi:10.1016/J.FREERADBIOMED.2015.06.008
- 1302 121. Youle RJ, Van Der Blik AM. Mitochondrial fission, fusion, and stress. Science. American  
1303 Association for the Advancement of Science; 2012. pp. 1062–1065.  
1304 doi:10.1126/science.1219855
- 1305 122. Twig G, Elorza A, Molina AJA, Mohamed H, Wikstrom JD, Walzer G, et al. Fission and  
1306 selective fusion govern mitochondrial segregation and elimination by autophagy. EMBO  
1307 J. 2008;27: 433–446. doi:10.1038/sj.emboj.7601963
- 1308 123. Stiernagle T. Maintenance of *C. elegans*. WormBook : the online review of *C. elegans*  
1309 biology. 2006. pp. 1–11. doi:10.1895/wormbook.1.101.1
- 1310 124. *C. elegans* Deletion Mutant Consortium. large-scale screening for targeted knockouts in  
1311 the *Caenorhabditis elegans* genome. G3 (Bethesda). 2012;2: 1415–25.

1312 doi:10.1534/g3.112.003830

1313 125. Li H, Durbin R. Fast and accurate short read alignment with Burrows–Wheeler transform.

1314 Bioinformatics. Oxford Academic; 2009;25: 1754–1760.

1315 doi:10.1093/BIOINFORMATICS/BTP324

1316 126. Li H, Handsaker B, Wysoker A, Fennell T, Ruan J, Homer N, et al. The Sequence

1317 Alignment/Map format and SAMtools. Bioinformatics. Oxford Academic; 2009;25: 2078–

1318 2079. doi:10.1093/BIOINFORMATICS/BTP352

1319 127. Koboldt DC, Chen K, Wylie T, Larson DE, McLellan MD, Mardis ER, et al. VarScan: variant

1320 detection in massively parallel sequencing of individual and pooled samples.

1321 Bioinformatics. Oxford Academic; 2009;25: 2283–2285.

1322 doi:10.1093/BIOINFORMATICS/BTP373

1323

1324
